# Supplementary material for: Dynamic signatures of electronically nonadiabatic coupling in sodium hydride: a rigorous test for the symmetric quasi-classical model applied to realistic, ab initio electronic states in the adiabatic representation
Source: Royal Society of Chemistry journal article supplement (doi:10.1039/d1cp04090a), 2022-01-01
Supplement: d1cp04090a1.zip [file nah_vgdc.xlsx]

## Sheet: VGDC
Bond Length (R)	Normal Mode (Q)	Potential Energy (X)	Potential Energy (A)	Potential Energy (B)	Potential Energy (C)	Potential Energy (D)	Gradient (A)	Gradient (C)	Gradient (D)	Derivative Coupling (A,C)	Derivative Coupling (A,D)	Derivative Coupling (C,D)
0.848959	-1	-162.361	-162.224	-162.211	-162.173	-162.153	-0.663119	-0.64867	-0.654303	0.299955	-0.253759	-0.370216
0.864956	-0.98466	-162.38	-162.243	-162.229	-162.191	-162.171	-0.633582	-0.619182	-0.624534	0.297293	-0.249647	-0.371156
0.880953	-0.96932	-162.398	-162.261	-162.246	-162.208	-162.189	-0.604742	-0.590419	-0.595484	0.294092	-0.244713	-0.370795
0.896951	-0.95398	-162.415	-162.278	-162.262	-162.225	-162.206	-0.57749	-0.563306	-0.568068	0.289661	-0.23791	-0.367472
0.912948	-0.93864	-162.431	-162.294	-162.278	-162.241	-162.222	-0.551435	-0.537438	-0.541915	0.284318	-0.230308	-0.361767
0.928945	-0.9233	-162.447	-162.31	-162.293	-162.256	-162.237	-0.526143	-0.512365	-0.516567	0.278393	-0.222196	-0.35454
0.944942	-0.90796	-162.462	-162.325	-162.307	-162.271	-162.252	-0.502466	-0.488956	-0.492917	0.271308	-0.213245	-0.344837
0.960939	-0.89262	-162.477	-162.339	-162.321	-162.285	-162.266	-0.479296	-0.466066	-0.469801	0.2639	-0.204132	-0.334509
0.976936	-0.87728	-162.49	-162.353	-162.334	-162.298	-162.279	-0.457397	-0.44447	-0.448016	0.255727	-0.194719	-0.322778
0.992933	-0.86194	-162.504	-162.366	-162.346	-162.31	-162.292	-0.4363	-0.423684	-0.427066	0.247193	-0.185324	-0.310502
1.00893	-0.8466	-162.516	-162.378	-162.358	-162.322	-162.304	-0.41593	-0.403629	-0.406872	0.238333	-0.175944	-0.297734
1.02493	-0.83126	-162.528	-162.39	-162.369	-162.334	-162.315	-0.396759	-0.384772	-0.387914	0.229139	-0.166851	-0.284599
1.04092	-0.81592	-162.54	-162.401	-162.38	-162.345	-162.326	-0.378018	-0.366342	-0.369397	0.219858	-0.15789	-0.27139
1.05692	-0.80058	-162.551	-162.412	-162.39	-162.355	-162.337	-0.36046	-0.349082	-0.352087	0.210453	-0.149409	-0.258176
1.07292	-0.78524	-162.562	-162.422	-162.4	-162.365	-162.347	-0.343471	-0.332381	-0.335353	0.201088	-0.141228	-0.245092
1.08892	-0.7699	-162.572	-162.432	-162.409	-162.374	-162.356	-0.327204	-0.316391	-0.31935	0.191774	-0.133428	-0.232172
1.10491	-0.75456	-162.581	-162.441	-162.418	-162.383	-162.365	-0.311845	-0.301288	-0.304257	0.182675	-0.126179	-0.219606
1.12091	-0.73922	-162.59	-162.45	-162.427	-162.392	-162.374	-0.296854	-0.286544	-0.289533	0.173674	-0.119157	-0.20719
1.13691	-0.72388	-162.599	-162.458	-162.434	-162.4	-162.382	-0.282946	-0.272857	-0.275888	0.165109	-0.112845	-0.195317
1.1529	-0.70854	-162.607	-162.466	-162.442	-162.408	-162.39	-0.269418	-0.259539	-0.262621	0.156782	-0.106865	-0.183592
1.1689	-0.6932	-162.615	-162.474	-162.449	-162.415	-162.397	-0.256577	-0.246888	-0.250037	0.148887	-0.101485	-0.172135
1.1849	-0.67786	-162.622	-162.481	-162.456	-162.422	-162.404	-0.244395	-0.234878	-0.238094	0.141375	-0.0963308	-0.161259
1.2009	-0.66252	-162.629	-162.488	-162.463	-162.429	-162.411	-0.232551	-0.223197	-0.226478	0.134058	-0.091292	-0.150681
1.21689	-0.64718	-162.636	-162.494	-162.469	-162.435	-162.417	-0.2216	-0.212384	-0.21575	0.127456	-0.0869705	-0.14062
1.23289	-0.63184	-162.642	-162.501	-162.475	-162.441	-162.423	-0.210914	-0.201828	-0.205281	0.12107	-0.0828253	-0.13074
1.24889	-0.6165	-162.648	-162.507	-162.481	-162.447	-162.429	-0.200853	-0.19188	-0.195424	0.1152	-0.0790863	-0.121295
1.26488	-0.60116	-162.654	-162.512	-162.486	-162.452	-162.435	-0.19125	-0.182377	-0.186015	0.109706	-0.0756376	-0.11219
1.28088	-0.58582	-162.66	-162.518	-162.491	-162.457	-162.44	-0.181984	-0.173203	-0.176936	0.104488	-0.0724026	-0.103335
1.29688	-0.57048	-162.665	-162.523	-162.496	-162.462	-162.445	-0.173365	-0.164659	-0.168489	0.0997687	-0.0695731	-0.0949961
1.31288	-0.55514	-162.669	-162.528	-162.5	-162.467	-162.45	-0.164959	-0.156324	-0.160251	0.095203	-0.0668776	-0.0868351
1.32887	-0.5398	-162.674	-162.532	-162.505	-162.471	-162.454	-0.157105	-0.148527	-0.152551	0.0910153	-0.0645284	-0.0791462
1.34487	-0.52446	-162.678	-162.537	-162.509	-162.475	-162.459	-0.14956	-0.141033	-0.145152	0.0869836	-0.0623764	-0.0717017
1.36087	-0.50912	-162.682	-162.541	-162.513	-162.479	-162.463	-0.142332	-0.133851	-0.138064	0.083113	-0.0604286	-0.06451
1.37686	-0.49378	-162.686	-162.545	-162.517	-162.483	-162.467	-0.135564	-0.127117	-0.131424	0.0795059	-0.0587811	-0.0577984
1.39286	-0.47844	-162.69	-162.549	-162.52	-162.487	-162.47	-0.128967	-0.120552	-0.124952	0.0759908	-0.0572533	-0.0512577
1.40886	-0.4631	-162.693	-162.553	-162.524	-162.49	-162.474	-0.122847	-0.114455	-0.118946	0.0726934	-0.0561043	-0.045144
1.42486	-0.44776	-162.696	-162.556	-162.527	-162.493	-162.477	-0.116927	-0.108555	-0.113136	0.0694631	-0.0550721	-0.0392371
1.44085	-0.43242	-162.699	-162.559	-162.53	-162.496	-162.481	-0.111297	-0.10294	-0.107609	0.0663307	-0.0542103	-0.0336315
1.45685	-0.41708	-162.702	-162.563	-162.533	-162.499	-162.484	-0.105988	-0.0976415	-0.102397	0.0633128	-0.0535903	-0.0283271
1.47285	-0.40174	-162.704	-162.566	-162.536	-162.502	-162.486	-0.100815	-0.0924779	-0.0973182	0.0603437	-0.0530736	-0.023151
1.48884	-0.3864	-162.707	-162.568	-162.538	-162.505	-162.489	-0.0960509	-0.087717	-0.0926395	0.0575203	-0.0528786	-0.0183444
1.50484	-0.37106	-162.709	-162.571	-162.541	-162.507	-162.492	-0.0914093	-0.0830777	-0.0880815	0.0547426	-0.0527843	-0.0136443
1.52084	-0.35572	-162.711	-162.574	-162.543	-162.509	-162.494	-0.0870266	-0.0786947	-0.0837775	0.0520613	-0.0529019	-0.00916858
1.53684	-0.34038	-162.713	-162.576	-162.545	-162.512	-162.497	-0.0828661	-0.0745302	-0.0796902	0.0494608	-0.0532173	-0.00486885
1.55283	-0.32504	-162.715	-162.579	-162.548	-162.514	-162.499	-0.0788377	-0.0704957	-0.0757318	0.0469084	-0.0536503	-0.00067377
1.56883	-0.3097	-162.717	-162.581	-162.55	-162.516	-162.501	-0.075108	-0.0667609	-0.07207	0.0444934	-0.0543171	0.00327785
1.58483	-0.29436	-162.718	-162.583	-162.551	-162.518	-162.503	-0.0714707	-0.0631184	-0.0684994	0.0421205	-0.0550593	0.00715802
1.60082	-0.27902	-162.72	-162.585	-162.553	-162.519	-162.505	-0.0680608	-0.0597024	-0.0651528	0.0398503	-0.055989	0.0108654
1.61682	-0.26368	-162.721	-162.587	-162.555	-162.521	-162.507	-0.0647999	-0.0564351	-0.0619531	0.0376514	-0.0570361	0.0144632
1.63282	-0.24834	-162.722	-162.589	-162.557	-162.523	-162.509	-0.0616648	-0.0532932	-0.0588775	0.0355127	-0.0581823	0.0179685
1.64881	-0.233	-162.723	-162.59	-162.558	-162.524	-162.51	-0.0587443	-0.050366	-0.0560137	0.0334819	-0.0594846	0.0213191
1.66481	-0.21766	-162.724	-162.592	-162.56	-162.526	-162.512	-0.055898	-0.0475131	-0.0532233	0.0314894	-0.0608381	0.0246166
1.68081	-0.20232	-162.725	-162.594	-162.561	-162.527	-162.513	-0.0532496	-0.0448585	-0.0506284	0.0296011	-0.0623197	0.0277738
1.69681	-0.18698	-162.726	-162.595	-162.562	-162.528	-162.515	-0.0506996	-0.0423028	-0.0481312	0.0277667	-0.0638556	0.0308632
1.7128	-0.17164	-162.727	-162.597	-162.564	-162.529	-162.516	-0.0482663	-0.0398643	-0.0457494	0.0259963	-0.0654558	0.033872
1.7288	-0.1563	-162.727	-162.598	-162.565	-162.531	-162.517	-0.0459833	-0.0375767	-0.0435173	0.0243379	-0.0671119	0.0366774
1.7448	-0.14096	-162.728	-162.599	-162.566	-162.532	-162.519	-0.0437594	-0.0353487	-0.0413439	0.0227188	-0.0687901	0.0394213
1.76079	-0.12562	-162.728	-162.6	-162.567	-162.533	-162.52	-0.041707	-0.0332945	-0.0393402	0.0211618	-0.0705345	0.0421886
1.77679	-0.11028	-162.729	-162.602	-162.568	-162.534	-162.521	-0.0397173	-0.0313036	-0.0373987	0.0196427	-0.0722902	0.0449181
1.79279	-0.09494	-162.729	-162.603	-162.569	-162.534	-162.522	-0.0378328	-0.0294193	-0.0355621	0.0181876	-0.074065	0.047584
1.80879	-0.0796	-162.729	-162.604	-162.57	-162.535	-162.523	-0.036053	-0.0276411	-0.0338298	0.0167977	-0.0758436	0.0501915
1.82478	-0.06426	-162.73	-162.605	-162.571	-162.536	-162.524	-0.0343229	-0.0259134	-0.0321471	0.0154389	-0.0776242	0.0527712
1.84078	-0.04892	-162.73	-162.606	-162.571	-162.537	-162.525	-0.0327322	-0.0243275	-0.0306037	0.014169	-0.0793892	0.0552819
1.85678	-0.03358	-162.73	-162.607	-162.572	-162.537	-162.526	-0.0311814	-0.0227823	-0.0291003	0.012925	-0.0811439	0.0577759
1.87277	-0.01824	-162.73	-162.608	-162.573	-162.538	-162.527	-0.0297232	-0.0213316	-0.0276897	0.0117412	-0.0828736	0.0602315
1.88877	-0.0029	-162.73	-162.608	-162.574	-162.539	-162.527	-0.0283358	-0.0199535	-0.0263503	0.0106038	-0.0845731	0.0626658
1.90477	0.01244	-162.73	-162.609	-162.574	-162.539	-162.528	-0.0269971	-0.018625	-0.0250597	0.00949833	-0.086252	0.0650855
1.92077	0.02778	-162.73	-162.61	-162.575	-162.54	-162.529	-0.0257568	-0.0173976	-0.0238683	0.00845747	-0.087873	0.0674908
1.93676	0.04312	-162.73	-162.611	-162.575	-162.54	-162.53	-0.024548	-0.0162026	-0.0227087	0.00743727	-0.089472	0.0698957
1.95276	0.05846	-162.73	-162.611	-162.576	-162.541	-162.53	-0.0234194	-0.0150902	-0.0216301	0.00646934	-0.091011	0.0723054
1.96876	0.0738	-162.73	-162.612	-162.576	-162.541	-162.531	-0.0223377	-0.0140263	-0.0205987	0.0055304	-0.0924957	0.0747181
1.98475	0.08914	-162.729	-162.613	-162.577	-162.542	-162.531	-0.0213014	-0.0130092	-0.0196131	0.00461949	-0.093928	0.0771338
2.00075	0.10448	-162.729	-162.613	-162.577	-162.542	-162.532	-0.0203338	-0.0120635	-0.018698	0.00375524	-0.0953006	0.0796111
2.01675	0.11982	-162.729	-162.614	-162.578	-162.542	-162.532	-0.0193911	-0.0111438	-0.0178086	0.0029073	-0.0966478	0.0821128
2.03275	0.13516	-162.729	-162.614	-162.578	-162.543	-162.533	-0.0185169	-0.0102954	-0.0169891	0.002101	-0.0979073	0.0846905
2.04874	0.1505	-162.728	-162.615	-162.578	-162.543	-162.533	-0.017673	-0.0094787	-0.0162006	0.00131154	-0.0991235	0.0873214
2.06474	0.16584	-162.728	-162.616	-162.579	-162.543	-162.534	-0.0168702	-0.00870503	-0.0154543	0.000545	-0.100281	0.0900247
2.08074	0.18118	-162.728	-162.616	-162.579	-162.543	-162.534	-0.0161152	-0.00798158	-0.0147572	-0.00019664	-0.101362	0.0928499
2.09673	0.19652	-162.727	-162.616	-162.579	-162.544	-162.535	-0.01538	-0.00727897	-0.0140806	-0.00092804	-0.102412	0.0957278
2.11273	0.21186	-162.727	-162.617	-162.58	-162.544	-162.535	-0.014703	-0.0066378	-0.0134642	-0.00163152	-0.10336	0.0988148
2.12873	0.2272	-162.726	-162.617	-162.58	-162.544	-162.536	-0.0140448	-0.00601654	-0.0128673	-0.00232699	-0.104273	0.101995
2.14473	0.24254	-162.726	-162.618	-162.58	-162.544	-162.536	-0.0134231	-0.00543408	-0.0123083	-0.00300681	-0.105117	0.105358
2.16072	0.25788	-162.725	-162.618	-162.58	-162.544	-162.536	-0.0128342	-0.00488651	-0.011784	-0.00367248	-0.105902	0.108964
2.17672	0.27322	-162.725	-162.618	-162.581	-162.544	-162.537	-0.0122635	-0.0043582	-0.0112787	-0.00433034	-0.106654	0.112704
2.19272	0.28856	-162.724	-162.619	-162.581	-162.544	-162.537	-0.011737	-0.00387753	-0.0108193	-0.00497832	-0.107302	0.116828
2.20871	0.3039	-162.724	-162.619	-162.581	-162.545	-162.537	-0.0112238	-0.00341118	-0.0103739	-0.00562359	-0.107919	0.121111
2.22471	0.31924	-162.723	-162.619	-162.581	-162.545	-162.537	-0.0107427	-0.00297938	-0.00996221	-0.00626247	-0.108464	0.1258
2.24071	0.33458	-162.723	-162.62	-162.581	-162.545	-162.538	-0.0102835	-0.0025715	-0.0095737	-0.00689925	-0.108957	0.130871
2.25671	0.34992	-162.722	-162.62	-162.581	-162.545	-162.538	-0.00984162	-0.00218249	-0.00920352	-0.00753438	-0.109409	0.136243
2.2727	0.36526	-162.722	-162.62	-162.582	-162.545	-162.538	-0.00943093	-0.00182767	-0.00886635	-0.00817056	-0.109784	0.142352
2.2887	0.3806	-162.721	-162.621	-162.582	-162.545	-162.539	-0.00903064	-0.00148442	-0.00854032	-0.00880838	-0.110134	0.148762
2.3047	0.39594	-162.72	-162.621	-162.582	-162.545	-162.539	-0.00865733	-0.00117157	-0.00824348	-0.0094535	-0.110414	0.156077
2.32069	0.41128	-162.72	-162.621	-162.582	-162.545	-162.539	-0.0082985	-0.00087479	-0.0079618	-0.0101043	-0.110655	0.164039
2.33669	0.42662	-162.719	-162.621	-162.582	-162.545	-162.539	-0.0079557	-0.0005958	-0.00769688	-0.0107613	-0.110854	0.172719
2.35269	0.44196	-162.719	-162.622	-162.582	-162.545	-162.539	-0.0076343	-0.00034129	-0.00745468	-0.0114356	-0.110992	0.182777
2.36868	0.4573	-162.718	-162.622	-162.582	-162.545	-162.54	-0.00732107	-9.617e-05	-0.00722112	-0.0121176	-0.111107	0.19342
2.38468	0.47264	-162.717	-162.622	-162.582	-162.545	-162.54	-0.00703068	0.00012222	-0.00701166	-0.0128295	-0.111154	0.206168
2.40068	0.48798	-162.717	-162.622	-162.582	-162.545	-162.54	-0.00674914	0.00032997	-0.00681141	-0.0135596	-0.111173	0.220098
2.41668	0.50332	-162.716	-162.622	-162.582	-162.545	-162.54	-0.00648146	0.00052108	-0.00662554	-0.0143179	-0.111147	0.235881
2.43267	0.51866	-162.715	-162.623	-162.583	-162.545	-162.54	-0.00622807	0.00069432	-0.00645416	-0.0151215	-0.111071	0.254497
2.44867	0.534	-162.715	-162.623	-162.583	-162.545	-162.541	-0.00598096	0.0008597	-0.00628913	-0.015945	-0.110973	0.274356
2.46467	0.54934	-162.714	-162.623	-162.583	-162.545	-162.541	-0.00575244	0.00100049	-0.006142	-0.0168585	-0.1108	0.299793
2.48066	0.56468	-162.713	-162.623	-162.583	-162.545	-162.541	-0.00552902	0.00113392	-0.00599934	-0.01781	-0.110601	0.327607
2.49666	0.58002	-162.713	-162.623	-162.583	-162.545	-162.541	-0.00531725	0.00125061	-0.00586688	-0.0188477	-0.110345	0.360838
2.51266	0.59536	-162.712	-162.623	-162.583	-162.545	-162.541	-0.00511468	0.00135236	-0.00574102	-0.0199905	-0.110031	0.400879
2.52866	0.6107	-162.711	-162.624	-162.583	-162.545	-162.542	-0.00491798	0.00144458	-0.00561937	-0.0212005	-0.109679	0.445272
2.54465	0.62604	-162.711	-162.624	-162.583	-162.545	-162.542	-0.00473339	0.00151266	-0.00550209	-0.022625	-0.109209	0.504772
2.56065	0.64138	-162.71	-162.624	-162.583	-162.545	-162.542	-0.00455264	0.00157178	-0.00538513	-0.0241456	-0.108695	0.571105
2.57665	0.65672	-162.709	-162.624	-162.583	-162.545	-162.542	-0.00438152	0.00160707	-0.00526788	-0.0259357	-0.108067	0.65667
2.59264	0.67206	-162.709	-162.624	-162.583	-162.545	-162.542	-0.00421606	0.00162176	-0.00514394	-0.0279822	-0.107317	0.762325
2.60864	0.6874	-162.708	-162.624	-162.583	-162.545	-162.542	-0.00405573	0.00161785	-0.00501396	-0.0302601	-0.106457	0.886127
2.62464	0.70274	-162.707	-162.624	-162.583	-162.545	-162.542	-0.00390354	0.00156774	-0.00485814	-0.0331322	-0.1053	1.05931
2.64064	0.71808	-162.707	-162.624	-162.583	-162.544	-162.543	-0.00375413	0.00149581	-0.00468777	-0.0362707	-0.103994	1.25486
2.65663	0.73342	-162.706	-162.625	-162.583	-162.544	-162.543	-0.00361186	0.00134481	-0.00445829	-0.0403354	-0.102126	1.52876
2.67263	0.74876	-162.705	-162.625	-162.583	-162.544	-162.543	-0.00347282	0.00113276	-0.00417539	-0.0449777	-0.0997893	1.85203
2.68863	0.7641	-162.704	-162.625	-162.583	-162.544	-162.543	-0.00333788	0.00084322	-0.00382467	-0.050353	-0.0968559	2.23795
2.70462	0.77944	-162.704	-162.625	-162.583	-162.544	-162.543	-0.00320778	0.00039899	-0.00333107	-0.0568087	-0.0926213	2.66681
2.72062	0.79478	-162.703	-162.625	-162.583	-162.544	-162.543	-0.00307957	-0.00010914	-0.00277852	-0.06367	-0.0878276	3.10083
2.73662	0.81012	-162.702	-162.625	-162.583	-162.544	-162.543	-0.00295588	-0.00082563	-0.00203484	-0.0712258	-0.0808783	3.35796
2.75262	0.82546	-162.702	-162.625	-162.583	-162.544	-162.543	-0.0028342	-0.00155625	-0.00128172	-0.0783657	-0.0734726	3.46415
2.76861	0.8408	-162.701	-162.625	-162.583	-162.544	-162.543	-0.00271615	-0.00231245	-0.00051152	-0.0847528	-0.0652411	3.29723
2.78461	0.85614	-162.7	-162.625	-162.583	-162.545	-162.543	-0.00260074	-0.00295845	0.00014004	-0.0896323	-0.0574083	2.95701
2.80061	0.87148	-162.7	-162.625	-162.583	-162.545	-162.543	-0.00248668	-0.00354795	0.00073076	-0.0937387	-0.04978	2.52793
2.8166	0.88682	-162.699	-162.625	-162.583	-162.545	-162.543	-0.00237615	-0.00393936	0.00111324	-0.0959643	-0.04374	2.11689
2.8326	0.90216	-162.698	-162.625	-162.583	-162.545	-162.543	-0.00226648	-0.00428523	0.00144719	-0.0978021	-0.0381866	1.73671
2.8486	0.9175	-162.698	-162.625	-162.583	-162.545	-162.543	-0.00215878	-0.00452736	0.00167033	-0.0987752	-0.0337911	1.43776
2.8646	0.93284	-162.697	-162.626	-162.583	-162.545	-162.543	-0.00205237	-0.00472179	0.00184095	-0.0993666	-0.0300817	1.19473
2.88059	0.94818	-162.696	-162.626	-162.583	-162.545	-162.543	-0.00194691	-0.00488113	0.00197294	-0.0996774	-0.0268768	0.992823
2.89659	0.96352	-162.696	-162.626	-162.583	-162.545	-162.543	-0.00184293	-0.00499956	0.00205763	-0.0996574	-0.0244045	0.849106
2.91259	0.97886	-162.695	-162.626	-162.583	-162.546	-162.543	-0.00173938	-0.00510753	0.00212986	-0.0995508	-0.0221384	0.721145
2.92858	0.9942	-162.695	-162.626	-162.583	-162.546	-162.543	-0.00163681	-0.00519393	0.00217551	-0.0992607	-0.0203415	0.627758
2.94458	1.00954	-162.694	-162.626	-162.583	-162.546	-162.543	-0.00153461	-0.0052726	0.00221089	-0.0988991	-0.0187447	0.547844
2.96058	1.02488	-162.693	-162.626	-162.583	-162.546	-162.543	-0.0014328	-0.00534329	0.00223564	-0.0984635	-0.0173548	0.481867
2.97658	1.04022	-162.693	-162.626	-162.583	-162.546	-162.543	-0.00133128	-0.00540624	0.00224924	-0.0979477	-0.0161988	0.430278
2.99257	1.05556	-162.692	-162.626	-162.583	-162.546	-162.543	-0.00122985	-0.00546655	0.00225898	-0.0974037	-0.0151247	0.383604
3.00857	1.0709	-162.691	-162.626	-162.583	-162.546	-162.543	-0.00112844	-0.00552116	0.00225992	-0.0967927	-0.0142454	0.347907
3.02457	1.08624	-162.691	-162.626	-162.583	-162.547	-162.543	-0.00102789	-0.00557483	0.00225795	-0.0961699	-0.0134336	0.315685
3.04056	1.10158	-162.69	-162.626	-162.583	-162.547	-162.542	-0.00092859	-0.00562713	0.00225174	-0.0955298	-0.0127204	0.28853
3.05656	1.11692	-162.69	-162.626	-162.583	-162.547	-162.542	-0.00082713	-0.00567564	0.00224177	-0.0948347	-0.0120947	0.265646
3.07256	1.13226	-162.689	-162.626	-162.583	-162.547	-162.542	-0.00072478	-0.00572256	0.00223021	-0.0941167	-0.0115061	0.244565
3.08856	1.1476	-162.688	-162.626	-162.583	-162.547	-162.542	-0.0006216	-0.00576686	0.00221467	-0.093358	-0.0110137	0.227823
3.10455	1.16294	-162.688	-162.626	-162.583	-162.547	-162.542	-0.00051805	-0.00581066	0.00219812	-0.0925865	-0.0105463	0.212145
3.12055	1.17828	-162.687	-162.626	-162.583	-162.548	-162.542	-0.00041376	-0.00585339	0.00217947	-0.0917883	-0.0101312	0.19871
3.13655	1.19362	-162.687	-162.626	-162.583	-162.548	-162.542	-0.00030868	-0.00589424	0.00215928	-0.0909706	-0.00975463	0.186821
3.15254	1.20896	-162.686	-162.626	-162.583	-162.548	-162.542	-0.00020313	-0.00593399	0.00213817	-0.0901413	-0.00940094	0.175852
3.16854	1.2243	-162.686	-162.626	-162.583	-162.548	-162.542	-9.623e-05	-0.00597177	0.0021153	-0.0892836	-0.00909311	0.166673
3.18454	1.23964	-162.685	-162.626	-162.583	-162.548	-162.542	1.113e-05	-0.00600892	0.00209194	-0.088417	-0.00879797	0.157981
3.20053	1.25498	-162.684	-162.626	-162.583	-162.549	-162.542	0.00011971	-0.00604446	0.00206744	-0.0875287	-0.00853295	0.150436
3.21653	1.27032	-162.684	-162.626	-162.582	-162.549	-162.542	0.00022919	-0.00607884	0.00204233	-0.086626	-0.00828513	0.143536
3.23253	1.28566	-162.683	-162.626	-162.582	-162.549	-162.542	0.00033943	-0.00611222	0.00201671	-0.0857112	-0.00805181	0.137182
3.24853	1.301	-162.683	-162.626	-162.582	-162.549	-162.542	0.00045119	-0.00614373	0.00199035	-0.0847749	-0.00783992	0.131636
3.26452	1.31634	-162.682	-162.626	-162.582	-162.549	-162.542	0.00056351	-0.00617456	0.00196376	-0.0838311	-0.00763494	0.126355
3.28052	1.33168	-162.682	-162.626	-162.582	-162.549	-162.542	0.00067739	-0.00620346	0.00193663	-0.082867	-0.00744695	0.12173
3.29652	1.34702	-162.681	-162.626	-162.582	-162.55	-162.541	0.00079211	-0.00623129	0.00190931	-0.0818926	-0.00726612	0.117396
3.31251	1.36236	-162.681	-162.626	-162.582	-162.55	-162.541	0.00090785	-0.00625785	0.00188174	-0.0809059	-0.00709378	0.113405
3.32851	1.3777	-162.68	-162.626	-162.582	-162.55	-162.541	0.00102523	-0.00628169	0.00185402	-0.0798971	-0.00692718	0.109757
3.34451	1.39304	-162.68	-162.626	-162.582	-162.55	-162.541	0.00114324	-0.00630459	0.00182623	-0.0788805	-0.00676328	0.10625
3.36051	1.40838	-162.679	-162.626	-162.582	-162.55	-162.541	0.00126268	-0.00632629	0.00179827	-0.0778517	-0.00661176	0.103221
3.3765	1.42372	-162.679	-162.626	-162.582	-162.55	-162.541	0.00138282	-0.00634703	0.00177043	-0.0768152	-0.00645922	0.100299
3.3925	1.43906	-162.678	-162.626	-162.582	-162.551	-162.541	0.00150415	-0.00636617	0.00174279	-0.0757658	-0.00630497	0.0975599
3.4085	1.4544	-162.678	-162.626	-162.582	-162.551	-162.541	0.0016266	-0.00638362	0.00171501	-0.0747046	-0.00615957	0.0950824
3.42449	1.46974	-162.677	-162.626	-162.582	-162.551	-162.541	0.0017496	-0.00640026	0.00168716	-0.0736378	-0.00601838	0.0927294
3.44049	1.48508	-162.677	-162.626	-162.582	-162.551	-162.541	0.00187434	-0.00641559	0.00165938	-0.0725589	-0.00588796	0.0907355
3.45649	1.50042	-162.676	-162.626	-162.582	-162.551	-162.541	0.0019995	-0.00642977	0.00163172	-0.0714734	-0.00575531	0.0887812
3.47249	1.51576	-162.676	-162.626	-162.582	-162.552	-162.541	0.00212563	-0.00644119	0.00160432	-0.0703721	-0.00561673	0.0869091
3.48848	1.5311	-162.675	-162.626	-162.582	-162.552	-162.541	0.00225257	-0.00645107	0.00157713	-0.0692615	-0.00547775	0.0851502
3.50448	1.54644	-162.675	-162.625	-162.582	-162.552	-162.541	0.00238008	-0.00645988	0.00155007	-0.0681445	-0.00533848	0.0834688
3.52048	1.56178	-162.675	-162.625	-162.582	-162.552	-162.541	0.00250869	-0.00646637	0.00152335	-0.0670142	-0.00519768	0.0819347
3.53647	1.57712	-162.674	-162.625	-162.582	-162.552	-162.541	0.00263785	-0.00647205	0.00149677	-0.0658789	-0.00505597	0.0804439
3.55247	1.59246	-162.674	-162.625	-162.582	-162.553	-162.541	0.00276872	-0.00647562	0.00147055	-0.0647299	-0.00491141	0.0790571
3.56847	1.6078	-162.673	-162.625	-162.582	-162.553	-162.541	0.00289878	-0.00647791	0.00144452	-0.0635789	-0.00476399	0.0777196
3.58447	1.62314	-162.673	-162.625	-162.582	-162.553	-162.541	0.00302806	-0.00647896	0.00141869	-0.0624258	-0.00461379	0.07643
3.60046	1.63848	-162.673	-162.625	-162.582	-162.553	-162.541	0.00315893	-0.00647804	0.00139329	-0.0612586	-0.00446376	0.0752574
3.61646	1.65382	-162.672	-162.625	-162.582	-162.553	-162.541	0.00329021	-0.00647638	0.00136806	-0.0600867	-0.00431332	0.0741226
3.63246	1.66916	-162.672	-162.625	-162.582	-162.553	-162.54	0.0034218	-0.00647255	0.00134329	-0.0589052	-0.00415946	0.0730702
3.64845	1.6845	-162.671	-162.625	-162.582	-162.554	-162.54	0.00355428	-0.00646608	0.00131875	-0.0577004	-0.00400261	0.0720353
3.66445	1.69984	-162.671	-162.625	-162.582	-162.554	-162.54	0.00368797	-0.00645602	0.00129454	-0.0564642	-0.00384172	0.0710242
3.68045	1.71518	-162.671	-162.624	-162.582	-162.554	-162.54	0.00382009	-0.00644702	0.00127071	-0.055253	-0.00367986	0.0700947
3.69645	1.73052	-162.67	-162.624	-162.582	-162.554	-162.54	0.00395161	-0.00643833	0.00124704	-0.0540508	-0.0035175	0.0691977
3.71244	1.74586	-162.67	-162.624	-162.582	-162.554	-162.54	0.00408269	-0.00642746	0.00122391	-0.0528405	-0.00335117	0.0683621
3.72844	1.7612	-162.67	-162.624	-162.582	-162.555	-162.54	0.00421354	-0.00641583	0.00120096	-0.0516273	-0.00318345	0.0675453
3.74444	1.77654	-162.669	-162.624	-162.582	-162.555	-162.54	0.00434393	-0.00640273	0.00117837	-0.0504086	-0.00301298	0.0667653
3.76043	1.79188	-162.669	-162.624	-162.582	-162.555	-162.54	0.00447368	-0.00638829	0.00115615	-0.0491856	-0.00283996	0.0660168
3.77643	1.80722	-162.669	-162.624	-162.582	-162.555	-162.54	0.00460308	-0.0063731	0.00113413	-0.0479603	-0.00266552	0.0652856
3.79243	1.82256	-162.668	-162.624	-162.582	-162.555	-162.54	0.00473121	-0.00635598	0.00111264	-0.0467293	-0.00248754	0.0645962
3.80843	1.8379	-162.668	-162.623	-162.582	-162.556	-162.54	0.00485886	-0.00633827	0.00109132	-0.0454967	-0.00230847	0.0639188
3.82442	1.85324	-162.668	-162.623	-162.582	-162.556	-162.54	0.0049853	-0.0063191	0.00107041	-0.0442601	-0.00212676	0.0632706
3.84042	1.86858	-162.667	-162.623	-162.582	-162.556	-162.54	0.00511068	-0.00629889	0.00104979	-0.0430212	-0.00194322	0.0626418
3.85642	1.88392	-162.667	-162.623	-162.582	-162.556	-162.54	0.00523523	-0.00627787	0.00102941	-0.0417802	-0.00175822	0.0620284
3.87241	1.89926	-162.667	-162.623	-162.582	-162.556	-162.54	0.00535789	-0.00625533	0.00100948	-0.0405361	-0.00157062	0.0614419
3.88841	1.9146	-162.666	-162.623	-162.582	-162.556	-162.54	0.00547983	-0.00623227	0.00098971	-0.0392911	-0.00138215	0.0608644
3.90441	1.92994	-162.666	-162.623	-162.582	-162.557	-162.54	0.00559974	-0.00620782	0.00097036	-0.0380437	-0.00119142	0.0603101
3.9204	1.94528	-162.666	-162.622	-162.582	-162.557	-162.54	0.00571835	-0.00618263	0.00095126	-0.0367952	-0.00099955	0.0597678
3.9364	1.96062	-162.666	-162.622	-162.582	-162.557	-162.54	0.00583554	-0.00615661	0.00093241	-0.0355456	-0.0008064	0.0592387
3.9524	1.97596	-162.665	-162.622	-162.582	-162.557	-162.54	0.00595041	-0.00612943	0.00091394	-0.0342949	-0.0006116	0.0587273
3.9684	1.9913	-162.665	-162.622	-162.582	-162.557	-162.54	0.00606435	-0.0061018	0.00089561	-0.0330438	-0.00041618	0.0582226
3.98439	2.00664	-162.665	-162.622	-162.582	-162.557	-162.54	0.00617537	-0.00607291	0.00087772	-0.0317918	-0.0002191	0.0577367
4.00039	2.02198	-162.665	-162.622	-162.582	-162.558	-162.54	0.00628506	-0.00604351	0.00086	-0.0305398	-2.144e-05	0.0572581
4.01639	2.03732	-162.664	-162.621	-162.582	-162.558	-162.54	0.00639267	-0.00601331	0.00084254	-0.0292877	0.00017712	0.0567909
4.03238	2.05266	-162.664	-162.621	-162.582	-162.558	-162.54	0.00649778	-0.00598226	0.0008254	-0.0280356	0.00037654	0.0563354
4.04838	2.068	-162.664	-162.621	-162.582	-162.558	-162.54	0.00660179	-0.00595084	0.00080839	-0.0267837	0.00057633	0.055885
4.06438	2.08334	-162.664	-162.621	-162.582	-162.558	-162.54	0.00670204	-0.00591828	0.0007918	-0.0255325	0.00077708	0.0554499
4.08038	2.09868	-162.663	-162.621	-162.582	-162.559	-162.54	0.00680109	-0.00588539	0.00077534	-0.0242816	0.00097803	0.055019
4.09637	2.11402	-162.663	-162.62	-162.582	-162.559	-162.54	0.00689742	-0.00585176	0.00075916	-0.0230315	0.00117946	0.0545977
4.11237	2.12936	-162.663	-162.62	-162.582	-162.559	-162.54	0.00699128	-0.00581754	0.00074323	-0.0217823	0.00138115	0.0541842
4.12837	2.1447	-162.663	-162.62	-162.582	-162.559	-162.54	0.00708357	-0.00578295	0.00072744	-0.0205337	0.001583	0.0537755
4.14436	2.16004	-162.663	-162.62	-162.582	-162.559	-162.54	0.00717206	-0.00574752	0.00071199	-0.0192869	0.001785	0.0533774
4.16036	2.17538	-162.662	-162.62	-162.582	-162.559	-162.54	0.00725929	-0.00571171	0.00069662	-0.0180399	0.00198633	0.0529908
4.17636	2.19072	-162.662	-162.619	-162.582	-162.56	-162.54	0.00734332	-0.00567486	0.0006814	-0.016792	0.00218526	0.0526412
4.19236	2.20606	-162.662	-162.619	-162.582	-162.56	-162.539	0.00742504	-0.00563787	0.00066647	-0.0155469	0.00238577	0.0522763
4.20835	2.2214	-162.662	-162.619	-162.582	-162.56	-162.539	0.00750469	-0.00560076	0.00065179	-0.0143045	0.00258769	0.0518975
4.22435	2.23674	-162.662	-162.619	-162.582	-162.56	-162.539	0.00758075	-0.00556307	0.00063739	-0.0130641	0.00278918	0.051526
4.24035	2.25208	-162.661	-162.618	-162.582	-162.56	-162.539	0.00765549	-0.00552518	0.0006231	-0.0118245	0.00299047	0.0511571
4.25634	2.26742	-162.661	-162.618	-162.582	-162.56	-162.539	0.00772647	-0.00548674	0.00060911	-0.010587	0.00319112	0.0507954
4.27234	2.28276	-162.661	-162.618	-162.582	-162.561	-162.539	0.00779555	-0.00544804	0.00059525	-0.00935079	0.00339136	0.0504369
4.28834	2.2981	-162.661	-162.618	-162.582	-162.561	-162.539	0.0078622	-0.00540901	0.00058157	-0.00811602	0.00359108	0.0500826
4.30434	2.31344	-162.661	-162.618	-162.582	-162.561	-162.539	0.00792563	-0.00536959	0.00056812	-0.00688323	0.00378995	0.0497335
4.32033	2.32878	-162.661	-162.617	-162.582	-162.561	-162.539	0.00798774	-0.00533	0.00055478	-0.00565123	0.00398846	0.0493865
4.33633	2.34412	-162.661	-162.617	-162.582	-162.561	-162.539	0.00804579	-0.00528998	0.00054171	-0.00442172	0.00418575	0.0490456
4.35233	2.35946	-162.66	-162.617	-162.582	-162.561	-162.539	0.00810234	-0.0052498	0.00052876	-0.00319309	0.00438251	0.0487069
4.36832	2.3748	-162.66	-162.617	-162.582	-162.561	-162.539	0.00815616	-0.00520934	0.00051599	-0.00196606	0.00457833	0.0483721
4.38432	2.39014	-162.66	-162.616	-162.582	-162.562	-162.539	0.00820724	-0.00516864	0.00050341	-0.00115062	0.00477309	0.0480412
4.40032	2.40548	-162.66	-162.616	-162.582	-162.562	-162.539	0.00825691	-0.00512781	0.00049093	-0.00054624	0.00496732	0.0477123
4.41632	2.42082	-162.66	-162.616	-162.582	-162.562	-162.539	0.00830262	-0.00508667	0.00047872	0.00125495	0.00515988	0.0473892
4.43231	2.43616	-162.66	-162.616	-162.582	-162.562	-162.539	0.00834711	-0.00504545	0.0004666	0.00292932	0.00535188	0.0470678
4.44831	2.4515	-162.66	-162.615	-162.581	-162.562	-162.539	0.00838868	-0.00500403	0.00045467	0.00415005	0.00554253	0.0467505
4.46431	2.46684	-162.659	-162.615	-162.581	-162.562	-162.539	0.008428	-0.00496255	0.00044287	0.00537099	0.00573228	0.0464401
4.4803	2.48218	-162.659	-162.615	-162.581	-162.562	-162.539	0.00846565	-0.00492103	0.00043116	0.00659208	0.00592137	0.0461349
4.4963	2.49752	-162.659	-162.615	-162.581	-162.563	-162.539	0.00850001	-0.00487793	0.0004197	0.00781553	0.00610858	0.0458192
4.5123	2.51286	-162.659	-162.614	-162.581	-162.563	-162.539	0.00853323	-0.00483486	0.00040833	0.00903777	0.00629508	0.0455049
4.5283	2.5282	-162.659	-162.614	-162.581	-162.563	-162.539	0.0085634	-0.00479287	0.00039714	0.0102534	0.00647958	0.0452031
4.54429	2.54354	-162.659	-162.614	-162.581	-162.563	-162.539	0.00859182	-0.00475079	0.00038609	0.0114685	0.00666286	0.0449027
4.56029	2.55888	-162.659	-162.614	-162.581	-162.563	-162.539	0.00861842	-0.00470861	0.00037517	0.0126831	0.00684485	0.0446037
4.57629	2.57422	-162.659	-162.613	-162.581	-162.563	-162.539	0.00864221	-0.00466759	0.00036447	0.0138922	0.00702469	0.0443145
4.59228	2.58956	-162.659	-162.613	-162.581	-162.563	-162.539	0.00866494	-0.00462652	0.00035385	0.0151011	0.00720382	0.0440262
4.60828	2.6049	-162.658	-162.613	-162.581	-162.564	-162.539	0.00868475	-0.00458246	0.00034346	0.0163208	0.00738146	0.0437241
4.62428	2.62024	-162.658	-162.613	-162.581	-162.564	-162.539	0.00870325	-0.0045391	0.00033314	0.0175382	0.00755784	0.0434288
4.64027	2.63558	-162.658	-162.612	-162.581	-162.564	-162.539	0.00871983	-0.00449673	0.00032292	0.0187521	0.00773237	0.0431434
4.65627	2.65092	-162.658	-162.612	-162.581	-162.564	-162.539	0.00873422	-0.00445432	0.00031286	0.0199663	0.00790493	0.0428602
4.67227	2.66626	-162.658	-162.612	-162.581	-162.564	-162.539	0.00874769	-0.0044119	0.00030286	0.0211807	0.00807664	0.042578
4.68827	2.6816	-162.658	-162.612	-162.581	-162.564	-162.539	0.00875867	-0.00436942	0.00029308	0.0223997	0.00824457	0.0422973
4.70426	2.69694	-162.658	-162.611	-162.581	-162.564	-162.539	0.0087686	-0.00432712	0.00028333	0.02362	0.00841365	0.0420249
4.72026	2.71228	-162.658	-162.611	-162.581	-162.564	-162.539	0.00877629	-0.00428522	0.00027363	0.0248432	0.00858514	0.04177
4.73626	2.72762	-162.658	-162.611	-162.581	-162.565	-162.539	0.00878227	-0.00424294	0.00026417	0.0260633	0.00875147	0.0415025
4.75225	2.74296	-162.658	-162.611	-162.581	-162.565	-162.539	0.00878723	-0.00420044	0.00025484	0.0272816	0.00891471	0.0412275
4.76825	2.7583	-162.658	-162.61	-162.581	-162.565	-162.539	0.0087899	-0.00415819	0.00024561	0.0284894	0.00906777	0.0409611
4.78425	2.77364	-162.658	-162.61	-162.581	-162.565	-162.539	0.00879177	-0.00411592	0.00023645	0.0297005	0.00922132	0.0406948
4.80025	2.78898	-162.658	-162.61	-162.581	-162.565	-162.539	0.00879165	-0.00407355	0.00022753	0.0309248	0.00937879	0.0404267
4.81624	2.80432	-162.657	-162.61	-162.581	-162.565	-162.539	0.00879024	-0.00403122	0.00021872	0.032151	0.00953473	0.0401602
4.83224	2.81966	-162.657	-162.609	-162.581	-162.565	-162.539	0.00878774	-0.00398891	0.00021001	0.0333789	0.00968935	0.0398949
4.84824	2.835	-162.657	-162.609	-162.581	-162.565	-162.539	0.00878332	-0.00394668	0.00020147	0.0346105	0.0098415	0.0396321
4.86423	2.85034	-162.657	-162.609	-162.581	-162.566	-162.539	0.00877823	-0.00390446	0.00019298	0.0358434	0.00999275	0.0393702
4.88023	2.86568	-162.657	-162.609	-162.581	-162.566	-162.539	0.00877131	-0.0038623	0.00018468	0.0370803	0.0101415	0.0391106
4.89623	2.88102	-162.657	-162.608	-162.581	-162.566	-162.539	0.00876344	-0.00382018	0.00017646	0.0383198	0.0102889	0.0388523
4.91223	2.89636	-162.657	-162.608	-162.581	-162.566	-162.539	0.00875447	-0.0037781	0.00016834	0.0395622	0.0104346	0.0385955
4.92822	2.9117	-162.657	-162.608	-162.581	-162.566	-162.539	0.00874397	-0.00373581	0.00016063	0.0407887	0.0105793	0.0383113
4.94422	2.92704	-162.657	-162.608	-162.581	-162.566	-162.539	0.00873287	-0.00369349	0.00015302	0.0420126	0.0107232	0.0380215
4.96022	2.94238	-162.657	-162.607	-162.581	-162.566	-162.539	0.00872011	-0.00365163	0.00014526	0.0432672	0.0108618	0.0377723
4.97621	2.95772	-162.657	-162.607	-162.581	-162.566	-162.539	0.0087067	-0.0036098	0.00013756	0.0445246	0.0109994	0.0375241
4.99221	2.97306	-162.657	-162.607	-162.581	-162.566	-162.539	0.00869218	-0.00356803	0.00012997	0.0457868	0.0111352	0.0372777
5.00821	2.9884	-162.657	-162.607	-162.581	-162.566	-162.539	0.00867652	-0.00352633	0.0001225	0.0470545	0.011269	0.0370332
5.02421	3.00374	-162.657	-162.606	-162.581	-162.567	-162.539	0.00866032	-0.00348467	0.00011509	0.0483249	0.0114019	0.0367896
5.0402	3.01908	-162.657	-162.606	-162.581	-162.567	-162.539	0.00864256	-0.0034431	0.00010785	0.0496042	0.011532	0.0365485
5.0562	3.03442	-162.657	-162.606	-162.581	-162.567	-162.539	0.00862434	-0.00340156	0.00010066	0.0508865	0.0116612	0.0363082
5.0722	3.04976	-162.657	-162.606	-162.581	-162.567	-162.539	0.00860503	-0.0033601	9.36e-05	0.0521757	0.0117884	0.0360696
5.08819	3.0651	-162.657	-162.605	-162.581	-162.567	-162.539	0.00858487	-0.00331869	8.662e-05	0.0534711	0.0119138	0.0358325
5.10419	3.08044	-162.656	-162.605	-162.581	-162.567	-162.539	0.00856413	-0.00327734	7.971e-05	0.0547709	0.0120381	0.0355964
5.12019	3.09578	-162.656	-162.605	-162.581	-162.567	-162.539	0.00854216	-0.00323608	7.295e-05	0.0560809	0.0121598	0.0353623
5.13619	3.11112	-162.656	-162.605	-162.581	-162.567	-162.539	0.00851979	-0.00319485	6.624e-05	0.0573946	0.0122806	0.035129
5.15218	3.12646	-162.656	-162.604	-162.581	-162.567	-162.539	0.00849638	-0.0031537	5.966e-05	0.0587179	0.0123992	0.0348974
5.16818	3.1418	-162.656	-162.604	-162.581	-162.567	-162.539	0.00847234	-0.00311259	5.305e-05	0.060048	0.0125155	0.0346703
5.18418	3.15714	-162.656	-162.604	-162.581	-162.568	-162.539	0.0084477	-0.00307152	4.642e-05	0.0613845	0.0126296	0.0344476
5.20017	3.17248	-162.656	-162.604	-162.581	-162.568	-162.539	0.0084221	-0.00303054	4.009e-05	0.0627323	0.012743	0.0342203
5.21617	3.18782	-162.656	-162.603	-162.581	-162.568	-162.539	0.00839613	-0.0029896	3.386e-05	0.0640843	0.0128559	0.0339921
5.23217	3.20316	-162.656	-162.603	-162.581	-162.568	-162.539	0.00836917	-0.00294875	2.778e-05	0.0654493	0.0129667	0.0337649
5.24817	3.2185	-162.656	-162.603	-162.581	-162.568	-162.539	0.00834176	-0.00290794	2.177e-05	0.0668209	0.0130765	0.0335381
5.26416	3.23384	-162.656	-162.603	-162.581	-162.568	-162.539	0.00831373	-0.00286717	1.585e-05	0.0682014	0.0131849	0.0333119
5.28016	3.24918	-162.656	-162.602	-162.581	-162.568	-162.539	0.00828481	-0.0028266	1.018e-05	0.0695982	0.0132878	0.0330844
5.29616	3.26452	-162.656	-162.602	-162.581	-162.568	-162.539	0.00825552	-0.00278609	4.59e-06	0.0710014	0.0133887	0.0328567
5.31215	3.27986	-162.656	-162.602	-162.581	-162.568	-162.539	0.00822547	-0.00274546	-1.09e-06	0.0724161	0.0134911	0.032636
5.32815	3.2952	-162.656	-162.602	-162.581	-162.568	-162.539	0.0081951	-0.00270485	-6.73e-06	0.0738369	0.0135926	0.0324158
5.34415	3.31054	-162.656	-162.601	-162.581	-162.568	-162.539	0.00816411	-0.0026643	-1.226e-05	0.0752696	0.0136924	0.0321967
5.36015	3.32588	-162.656	-162.601	-162.581	-162.568	-162.539	0.00813253	-0.00262377	-1.771e-05	0.0767145	0.0137906	0.0319786
5.37614	3.34122	-162.656	-162.601	-162.581	-162.569	-162.539	0.00810063	-0.00258327	-2.312e-05	0.0781662	0.0138879	0.0317609
5.39214	3.35656	-162.656	-162.601	-162.581	-162.569	-162.539	0.00806791	-0.00254282	-2.839e-05	0.0796367	0.0139828	0.0315447
5.40814	3.3719	-162.656	-162.601	-162.581	-162.569	-162.539	0.00803492	-0.00250238	-3.361e-05	0.0811136	0.014077	0.0313288
5.42413	3.38724	-162.656	-162.6	-162.581	-162.569	-162.539	0.00800131	-0.00246197	-3.874e-05	0.0826059	0.0141693	0.0311139
5.44013	3.40258	-162.656	-162.6	-162.581	-162.569	-162.539	0.00796722	-0.00242152	-4.397e-05	0.0841104	0.014259	0.0309067
5.45613	3.41792	-162.656	-162.6	-162.581	-162.569	-162.539	0.00793274	-0.00238105	-4.927e-05	0.0856244	0.0143466	0.0307057
5.47212	3.43326	-162.656	-162.6	-162.581	-162.569	-162.539	0.00789763	-0.00234065	-5.418e-05	0.0871582	0.0144346	0.0304935
5.48812	3.4486	-162.656	-162.599	-162.581	-162.569	-162.539	0.00786229	-0.00230027	-5.9e-05	0.0886991	0.0145222	0.0302797
5.50412	3.46394	-162.656	-162.599	-162.581	-162.569	-162.539	0.00782631	-0.00225989	-6.371e-05	0.0902591	0.0146079	0.0300668
5.52012	3.47928	-162.656	-162.599	-162.581	-162.569	-162.539	0.0077897	-0.00221994	-6.823e-05	0.0918306	0.0146935	0.0298486
5.53611	3.49462	-162.656	-162.599	-162.581	-162.569	-162.539	0.00775242	-0.00218048	-7.251e-05	0.0934147	0.0147793	0.0296244
5.55211	3.50996	-162.656	-162.598	-162.581	-162.569	-162.539	0.00771532	-0.00214029	-7.696e-05	0.0950153	0.0148612	0.0294128
5.56811	3.5253	-162.656	-162.598	-162.581	-162.569	-162.539	0.00767817	-0.0020999	-8.143e-05	0.0966225	0.0149416	0.0292049
5.5841	3.54064	-162.656	-162.598	-162.581	-162.569	-162.539	0.00763998	-0.00205959	-8.583e-05	0.098251	0.015018	0.028998
5.6001	3.55598	-162.656	-162.598	-162.581	-162.569	-162.539	0.00760153	-0.00201922	-9.018e-05	0.0998916	0.0150937	0.0287912
5.6161	3.57132	-162.656	-162.598	-162.581	-162.57	-162.539	0.00756267	-0.00197878	-9.445e-05	0.101551	0.0151685	0.0285847
5.6321	3.58666	-162.656	-162.597	-162.581	-162.57	-162.539	0.00752333	-0.0019381	-9.869e-05	0.10323	0.0152416	0.0283793
5.64809	3.602	-162.656	-162.597	-162.581	-162.57	-162.539	0.00748378	-0.00189731	-0.00010291	0.104918	0.015314	0.0281742
5.66409	3.61734	-162.656	-162.597	-162.581	-162.57	-162.539	0.00744355	-0.00185668	-0.00010697	0.106632	0.015384	0.0279697
5.68009	3.63268	-162.656	-162.597	-162.581	-162.57	-162.539	0.00740311	-0.00181602	-0.000111	0.108355	0.0154533	0.0277655
5.69608	3.64802	-162.656	-162.597	-162.581	-162.57	-162.539	0.0073622	-0.00177529	-0.00011496	0.110098	0.015521	0.0275619
5.71208	3.66336	-162.655	-162.596	-162.581	-162.57	-162.539	0.00732088	-0.00173447	-0.00011884	0.111858	0.0155872	0.0273588
5.72808	3.6787	-162.655	-162.596	-162.581	-162.57	-162.539	0.0072793	-0.0016936	-0.00012268	0.113629	0.0156526	0.027156
5.74408	3.69404	-162.655	-162.596	-162.581	-162.57	-162.539	0.00723712	-0.00165259	-0.00012644	0.115427	0.0157158	0.026954
5.76007	3.70938	-162.655	-162.596	-162.581	-162.57	-162.539	0.00719473	-0.00161152	-0.00013017	0.117234	0.0157783	0.0267522
5.77607	3.72472	-162.655	-162.595	-162.581	-162.57	-162.539	0.00715182	-0.00157032	-0.00013383	0.119064	0.015839	0.0265509
5.79207	3.74006	-162.655	-162.595	-162.581	-162.57	-162.539	0.00710855	-0.00152902	-0.00013743	0.120909	0.0158985	0.02635
5.80806	3.7554	-162.655	-162.595	-162.581	-162.57	-162.539	0.00706498	-0.00148763	-0.00014099	0.122768	0.0159569	0.0261494
5.82406	3.77074	-162.655	-162.595	-162.581	-162.57	-162.539	0.00702084	-0.00144605	-0.00014446	0.124652	0.0160134	0.0259493
5.84006	3.78608	-162.655	-162.595	-162.581	-162.57	-162.539	0.00697651	-0.0014044	-0.00014791	0.126545	0.0160692	0.0257494
5.85606	3.80142	-162.655	-162.594	-162.581	-162.57	-162.539	0.0069316	-0.00136255	-0.00015127	0.128464	0.016123	0.0255499
5.87205	3.81676	-162.655	-162.594	-162.581	-162.57	-162.539	0.00688639	-0.00132058	-0.00015459	0.130395	0.0161758	0.0253506
5.88805	3.8321	-162.655	-162.594	-162.581	-162.57	-162.539	0.0068408	-0.00127848	-0.00015787	0.132343	0.0162272	0.0251515
5.90405	3.84744	-162.655	-162.594	-162.581	-162.57	-162.539	0.00679471	-0.00123615	-0.00016108	0.134313	0.0162769	0.0249528
5.92004	3.86278	-162.655	-162.594	-162.581	-162.57	-162.539	0.0067484	-0.00119374	-0.00016426	0.136291	0.016326	0.0247541
5.93604	3.87812	-162.655	-162.593	-162.581	-162.57	-162.539	0.00670144	-0.00115104	-0.00016735	0.138297	0.0163727	0.0245558
5.95204	3.89346	-162.655	-162.593	-162.581	-162.57	-162.539	0.00665423	-0.0011082	-0.00017039	0.140313	0.0164208	0.0243552
5.96804	3.9088	-162.655	-162.593	-162.581	-162.57	-162.539	0.00660656	-0.00106511	-0.00017329	0.142349	0.0164712	0.0241504
5.98403	3.92414	-162.655	-162.593	-162.581	-162.571	-162.539	0.00655844	-0.00102183	-0.00017621	0.144401	0.016516	0.02395
6.00003	3.93948	-162.655	-162.593	-162.581	-162.571	-162.539	0.0065101	-0.00097845	-0.00017913	0.146461	0.0165578	0.0237518
6.01603	3.95482	-162.655	-162.593	-162.581	-162.571	-162.539	0.00645481	-0.00093072	-0.00018133	0.148612	0.0165735	0.0235515
6.03202	3.97016	-162.655	-162.592	-162.581	-162.571	-162.539	0.00639928	-0.00088283	-0.00018351	0.150766	0.0165882	0.023351
6.04802	3.9855	-162.655	-162.592	-162.581	-162.571	-162.539	0.00634375	-0.00083495	-0.00018569	0.15292	0.016603	0.0231506
6.06402	4.00084	-162.655	-162.592	-162.581	-162.571	-162.539	0.00628822	-0.00078706	-0.00018787	0.155073	0.0166177	0.0229502
6.08002	4.01618	-162.655	-162.592	-162.581	-162.571	-162.539	0.00623269	-0.00073918	-0.00019005	0.157227	0.0166325	0.0227497
6.09601	4.03152	-162.655	-162.592	-162.581	-162.571	-162.539	0.00617716	-0.00069129	-0.00019223	0.159381	0.0166472	0.0225493
6.11201	4.04686	-162.655	-162.592	-162.581	-162.571	-162.539	0.00612163	-0.00064341	-0.0001944	0.161535	0.016662	0.0223489
6.12801	4.0622	-162.655	-162.591	-162.581	-162.571	-162.539	0.0060661	-0.00059553	-0.00019658	0.163689	0.0166767	0.0221485
6.144	4.07754	-162.655	-162.591	-162.581	-162.571	-162.539	0.00601057	-0.00054764	-0.00019876	0.165843	0.0166915	0.021948
6.16	4.09288	-162.655	-162.591	-162.581	-162.571	-162.539	0.00595504	-0.00049976	-0.00020094	0.167997	0.0167062	0.0217476
6.176	4.10822	-162.655	-162.591	-162.581	-162.571	-162.539	0.00589951	-0.00045187	-0.00020312	0.17015	0.016721	0.0215472
6.19199	4.12356	-162.655	-162.591	-162.581	-162.571	-162.539	0.00584398	-0.00040399	-0.0002053	0.172304	0.0167357	0.0213467
6.20799	4.1389	-162.655	-162.591	-162.581	-162.571	-162.539	0.00578845	-0.0003561	-0.00020747	0.174458	0.0167505	0.0211463
6.22399	4.15424	-162.655	-162.59	-162.581	-162.571	-162.539	0.00573292	-0.00030822	-0.00020965	0.176612	0.0167652	0.0209459
6.23999	4.16958	-162.655	-162.59	-162.581	-162.571	-162.539	0.00567739	-0.00026033	-0.00021183	0.178766	0.01678	0.0207454
6.25598	4.18492	-162.655	-162.59	-162.581	-162.571	-162.539	0.00562186	-0.00021245	-0.00021401	0.18092	0.0167947	0.020545
6.27198	4.20026	-162.655	-162.59	-162.581	-162.571	-162.539	0.00556633	-0.00016456	-0.00021619	0.183074	0.0168095	0.0203446
6.28798	4.2156	-162.655	-162.59	-162.581	-162.571	-162.539	0.0055108	-0.00011668	-0.00021837	0.185228	0.0168242	0.0201442
6.30397	4.23094	-162.655	-162.59	-162.581	-162.571	-162.539	0.00545527	-6.879e-05	-0.00022054	0.187381	0.016839	0.0199437
6.31997	4.24628	-162.655	-162.589	-162.581	-162.571	-162.539	0.00539974	-2.091e-05	-0.00022272	0.189535	0.0168537	0.0197433
6.33597	4.26162	-162.655	-162.589	-162.581	-162.571	-162.539	0.00534421	2.698e-05	-0.0002249	0.191689	0.0168685	0.0195429
6.35197	4.27696	-162.655	-162.589	-162.581	-162.571	-162.539	0.00528868	7.486e-05	-0.00022708	0.193843	0.0168832	0.0193425
6.36796	4.2923	-162.655	-162.589	-162.581	-162.571	-162.539	0.00523315	0.00012275	-0.00022926	0.195997	0.016898	0.019142
6.38396	4.30764	-162.655	-162.589	-162.581	-162.571	-162.539	0.00517762	0.00017063	-0.00023144	0.198151	0.0169127	0.0189416
6.39996	4.32298	-162.655	-162.589	-162.581	-162.571	-162.539	0.00512209	0.00021851	-0.00023361	0.200305	0.0169275	0.0187412
6.41595	4.33832	-162.655	-162.588	-162.581	-162.571	-162.539	0.00506656	0.0002664	-0.00023579	0.202458	0.0169422	0.0185407
6.43195	4.35366	-162.655	-162.588	-162.581	-162.571	-162.539	0.00501103	0.00031428	-0.00023797	0.204612	0.016957	0.0183403
6.44795	4.369	-162.655	-162.588	-162.581	-162.571	-162.539	0.0049555	0.00036217	-0.00024015	0.206766	0.0169717	0.0181399
6.46395	4.38434	-162.655	-162.588	-162.581	-162.571	-162.539	0.00489997	0.00041005	-0.00024233	0.20892	0.0169865	0.0179394
6.47994	4.39968	-162.655	-162.588	-162.581	-162.571	-162.539	0.00484444	0.00045794	-0.00024451	0.211074	0.0170012	0.017739
6.49594	4.41502	-162.655	-162.588	-162.581	-162.571	-162.539	0.00478891	0.00050582	-0.00024668	0.213228	0.017016	0.0175386
6.51194	4.43036	-162.655	-162.587	-162.581	-162.571	-162.539	0.00473338	0.00055371	-0.00024886	0.215382	0.0170307	0.0173382
6.52793	4.4457	-162.655	-162.587	-162.581	-162.571	-162.539	0.00467285	0.0006052	-0.00025055	0.217377	0.0170222	0.0171319
6.54393	4.46104	-162.655	-162.587	-162.581	-162.571	-162.539	0.00461073	0.00065782	-0.00025207	0.219318	0.0170063	0.0169238
6.55993	4.47638	-162.655	-162.587	-162.581	-162.571	-162.539	0.00454816	0.00071061	-0.0002535	0.221193	0.0169867	0.0167152
6.57593	4.49172	-162.655	-162.587	-162.581	-162.571	-162.539	0.00448544	0.0007635	-0.00025491	0.223042	0.0169659	0.0165063
6.59192	4.50706	-162.655	-162.587	-162.581	-162.571	-162.539	0.00442248	0.00081656	-0.00025629	0.224845	0.0169429	0.0162969
6.60792	4.5224	-162.655	-162.587	-162.581	-162.571	-162.539	0.00435927	0.00086976	-0.00025762	0.226594	0.0169175	0.0160869
6.62392	4.53774	-162.655	-162.587	-162.581	-162.571	-162.539	0.00429595	0.00092303	-0.00025894	0.228317	0.0168909	0.0158767
6.63991	4.55308	-162.655	-162.586	-162.581	-162.571	-162.539	0.00423236	0.00097645	-0.00026019	0.229954	0.016861	0.0156657
6.65591	4.56842	-162.655	-162.586	-162.581	-162.571	-162.539	0.00416871	0.0010299	-0.00026143	0.231562	0.01683	0.0154545
6.67191	4.58376	-162.655	-162.586	-162.581	-162.571	-162.539	0.0041049	0.00108343	-0.00026263	0.233102	0.0167965	0.0152429
6.68791	4.5991	-162.655	-162.586	-162.581	-162.571	-162.539	0.00404102	0.00113696	-0.0002638	0.234581	0.0167609	0.0150308
6.7039	4.61444	-162.655	-162.586	-162.581	-162.57	-162.539	0.00397707	0.00119051	-0.00026494	0.236018	0.0167239	0.0148186
6.7199	4.62978	-162.655	-162.586	-162.581	-162.57	-162.539	0.00391308	0.001244	-0.00026604	0.237357	0.0166838	0.0146058
6.7359	4.64512	-162.655	-162.586	-162.581	-162.57	-162.539	0.00384912	0.0012974	-0.00026711	0.238661	0.0166427	0.0143931
6.75189	4.66046	-162.655	-162.586	-162.581	-162.57	-162.539	0.00378531	0.00135047	-0.00026815	0.239878	0.0165987	0.0141806
6.76789	4.6758	-162.655	-162.585	-162.581	-162.57	-162.539	0.00372148	0.00140358	-0.00026915	0.241029	0.0165531	0.0139676
6.78389	4.69114	-162.655	-162.585	-162.581	-162.57	-162.539	0.00365762	0.00145675	-0.00027013	0.242117	0.0165058	0.0137541
6.79989	4.70648	-162.655	-162.585	-162.581	-162.57	-162.539	0.00359393	0.00150967	-0.00027107	0.243101	0.016456	0.0135405
6.81588	4.72182	-162.655	-162.585	-162.581	-162.57	-162.539	0.00353031	0.0015625	-0.00027199	0.244045	0.0164051	0.0133269
6.83188	4.73716	-162.655	-162.585	-162.581	-162.57	-162.539	0.00346696	0.00161498	-0.00027287	0.24487	0.0163514	0.0131133
6.84788	4.7525	-162.655	-162.585	-162.581	-162.57	-162.539	0.00340377	0.00166727	-0.00027372	0.245638	0.0162963	0.0128997
6.86387	4.76784	-162.655	-162.585	-162.581	-162.57	-162.539	0.00334081	0.0017193	-0.00027455	0.246325	0.0162395	0.0126863
6.87987	4.78318	-162.655	-162.585	-162.581	-162.57	-162.539	0.00327819	0.00177092	-0.00027533	0.246909	0.0161805	0.0124731
6.89587	4.79852	-162.655	-162.585	-162.581	-162.57	-162.539	0.00321573	0.00182237	-0.0002761	0.247449	0.0161206	0.0122601
6.91186	4.81386	-162.655	-162.585	-162.581	-162.57	-162.539	0.00315382	0.0018732	-0.00027683	0.24785	0.0160578	0.0120476
6.92786	4.8292	-162.655	-162.584	-162.581	-162.57	-162.539	0.00309214	0.00192378	-0.00027751	0.2482	0.0159939	0.0118348
6.94386	4.84454	-162.655	-162.584	-162.581	-162.57	-162.539	0.0030309	0.00197387	-0.00027809	0.248452	0.0159277	0.0116213
6.95986	4.85988	-162.655	-162.584	-162.581	-162.57	-162.539	0.00297014	0.00202344	-0.00027871	0.248609	0.0158602	0.0114096
6.97585	4.87522	-162.655	-162.584	-162.581	-162.57	-162.539	0.00290966	0.00207272	-0.00027934	0.248713	0.015792	0.0111988
6.99185	4.89056	-162.655	-162.584	-162.581	-162.57	-162.539	0.00284997	0.00212116	-0.00027992	0.248676	0.0157214	0.0109892
7.00785	4.9059	-162.655	-162.584	-162.581	-162.57	-162.539	0.00279056	0.00216931	-0.00028049	0.248593	0.0156502	0.0107799
7.02384	4.92124	-162.655	-162.584	-162.581	-162.569	-162.539	0.00273183	0.00221674	-0.00028102	0.248399	0.0155771	0.0105717
7.03984	4.93658	-162.655	-162.584	-162.581	-162.569	-162.54	0.00267366	0.00226358	-0.00028152	0.248123	0.0155029	0.0103643
7.05584	4.95192	-162.655	-162.584	-162.581	-162.569	-162.54	0.00261594	0.00230995	-0.00028201	0.247781	0.0154277	0.0101576
7.07184	4.96726	-162.655	-162.584	-162.581	-162.569	-162.54	0.00255914	0.00235537	-0.00028246	0.247314	0.0153507	0.00995244
7.08783	4.9826	-162.655	-162.584	-162.581	-162.569	-162.54	0.00250268	0.00240043	-0.0002829	0.246803	0.015273	0.0097479
7.10383	4.99794	-162.655	-162.584	-162.581	-162.569	-162.54	0.00244717	0.00244452	-0.00028329	0.246173	0.0151938	0.00954501
7.11983	5.01328	-162.655	-162.584	-162.581	-162.569	-162.54	0.00239223	0.00248803	-0.00028367	0.245478	0.0151138	0.00934317
7.13582	5.02862	-162.655	-162.583	-162.581	-162.569	-162.54	0.00233792	0.00253088	-0.00028401	0.24471	0.0150328	0.00914248
7.15182	5.04396	-162.655	-162.583	-162.581	-162.569	-162.54	0.00228458	0.00257273	-0.00028433	0.243837	0.0149506	0.00894365
7.16782	5.0593	-162.655	-162.583	-162.581	-162.569	-162.54	0.00223163	0.00261419	-0.00028464	0.242923	0.0148679	0.00874548
7.18382	5.07464	-162.655	-162.583	-162.581	-162.569	-162.54	0.00217985	0.00265457	-0.00028494	0.24189	0.0147844	0.0085488
7.19981	5.08998	-162.655	-162.583	-162.581	-162.569	-162.54	0.00212861	0.00269436	-0.00028521	0.240809	0.0147001	0.00835353
7.21581	5.10532	-162.655	-162.583	-162.581	-162.569	-162.54	0.0020782	0.00273324	-0.00028543	0.239653	0.0146148	0.00816049
7.23181	5.12066	-162.655	-162.583	-162.581	-162.569	-162.54	0.00202874	0.00277114	-0.00028563	0.238415	0.0145287	0.00796946
7.2478	5.136	-162.655	-162.583	-162.581	-162.568	-162.54	0.00197971	0.00280862	-0.00028581	0.237141	0.0144422	0.00777931
7.2638	5.15134	-162.655	-162.583	-162.581	-162.568	-162.54	0.00193208	0.00284467	-0.00028595	0.235755	0.0143547	0.00759223
7.2798	5.16668	-162.655	-162.583	-162.581	-162.568	-162.54	0.00188489	0.00288029	-0.00028608	0.234338	0.0142669	0.00740612
7.2958	5.18202	-162.655	-162.583	-162.581	-162.568	-162.54	0.00183869	0.00291491	-0.00028618	0.232849	0.0141786	0.00722223
7.31179	5.19736	-162.655	-162.583	-162.581	-162.568	-162.54	0.00179337	0.00294865	-0.00028626	0.2313	0.0140897	0.00704036
7.32779	5.2127	-162.655	-162.583	-162.581	-162.568	-162.54	0.0017486	0.00298181	-0.00028632	0.229714	0.0140005	0.00685979
7.34379	5.22804	-162.655	-162.583	-162.581	-162.568	-162.54	0.00170517	0.00301364	-0.00028634	0.228045	0.0139108	0.00668236
7.35978	5.24338	-162.655	-162.583	-162.581	-162.568	-162.54	0.0016622	0.00304507	-0.00028636	0.22635	0.0138208	0.00650591
7.37578	5.25872	-162.655	-162.583	-162.581	-162.568	-162.54	0.00162039	0.00307549	-0.00028637	0.224589	0.01373	0.0063319
7.39178	5.27406	-162.655	-162.583	-162.581	-162.568	-162.54	0.00157931	0.00310506	-0.00028635	0.222791	0.0136393	0.00615996
7.40778	5.2894	-162.655	-162.583	-162.581	-162.568	-162.54	0.00153888	0.00313387	-0.0002863	0.220958	0.0135485	0.00598989
7.42377	5.30474	-162.655	-162.582	-162.581	-162.567	-162.54	0.00149965	0.00316148	-0.00028622	0.219069	0.0134574	0.00582287
7.43977	5.32008	-162.655	-162.582	-162.581	-162.567	-162.54	0.00146086	0.00318865	-0.00028612	0.217161	0.0133667	0.00565548
7.45577	5.33542	-162.655	-162.582	-162.581	-162.567	-162.54	0.0014233	0.00321453	-0.00028597	0.215196	0.0132786	0.00548178
7.47176	5.35076	-162.655	-162.582	-162.581	-162.567	-162.54	0.00138637	0.00323982	-0.00028581	0.213211	0.0131891	0.00531438
7.48776	5.3661	-162.655	-162.582	-162.581	-162.567	-162.54	0.00135023	0.00326436	-0.00028565	0.2112	0.0130975	0.00515498
7.50376	5.38144	-162.655	-162.582	-162.581	-162.567	-162.54	0.00131512	0.00328787	-0.00028547	0.209156	0.0130059	0.00499836
7.51976	5.39678	-162.655	-162.582	-162.581	-162.567	-162.54	0.00128041	0.00331096	-0.00028528	0.207098	0.0129143	0.0048428
7.53575	5.41212	-162.655	-162.582	-162.581	-162.567	-162.54	0.00124678	0.00333292	-0.00028505	0.204989	0.0128228	0.00468947
7.55175	5.42746	-162.655	-162.582	-162.581	-162.567	-162.54	0.00121369	0.00335435	-0.00028481	0.202873	0.0127312	0.00453796
7.56775	5.4428	-162.655	-162.582	-162.581	-162.567	-162.54	0.00118158	0.00337484	-0.00028454	0.200747	0.0126395	0.00438974
7.58374	5.45814	-162.655	-162.582	-162.581	-162.567	-162.54	0.00115576	0.00338911	-0.00028412	0.198618	0.0125496	0.00426119
7.59974	5.47348	-162.655	-162.582	-162.581	-162.566	-162.54	0.00113316	0.00340021	-0.00028363	0.196488	0.0124606	0.00414273
7.61574	5.48882	-162.655	-162.582	-162.581	-162.566	-162.54	0.00111056	0.0034113	-0.00028313	0.194358	0.0123717	0.00402426
7.63174	5.50416	-162.655	-162.582	-162.581	-162.566	-162.54	0.00108797	0.0034224	-0.00028264	0.192228	0.0122827	0.00390579
7.64773	5.5195	-162.655	-162.582	-162.581	-162.566	-162.54	0.00106537	0.0034335	-0.00028214	0.190097	0.0121937	0.00378733
7.66373	5.53484	-162.655	-162.582	-162.581	-162.566	-162.54	0.00104277	0.00344459	-0.00028164	0.187967	0.0121047	0.00366886
7.67973	5.55018	-162.655	-162.582	-162.581	-162.566	-162.54	0.00102017	0.00345569	-0.00028115	0.185837	0.0120158	0.00355039
7.69572	5.56552	-162.655	-162.582	-162.581	-162.566	-162.54	0.00099757	0.00346678	-0.00028065	0.183707	0.0119268	0.00343193
7.71172	5.58086	-162.655	-162.582	-162.581	-162.566	-162.54	0.00097497	0.00347788	-0.00028016	0.181577	0.0118378	0.00331346
7.72772	5.5962	-162.655	-162.582	-162.581	-162.566	-162.54	0.00095237	0.00348897	-0.00027966	0.179447	0.0117488	0.00319499
7.74371	5.61154	-162.655	-162.582	-162.581	-162.566	-162.54	0.00092977	0.00350007	-0.00027917	0.177317	0.0116598	0.00307653
7.75971	5.62688	-162.655	-162.582	-162.581	-162.565	-162.54	0.00090717	0.00351116	-0.00027867	0.175186	0.0115709	0.00295806
7.77571	5.64222	-162.655	-162.582	-162.581	-162.565	-162.54	0.00088458	0.00352226	-0.00027818	0.173056	0.0114819	0.00283959
7.79171	5.65756	-162.655	-162.582	-162.581	-162.565	-162.54	0.00086198	0.00353335	-0.00027768	0.170926	0.0113929	0.00272113
7.8077	5.6729	-162.655	-162.582	-162.581	-162.565	-162.54	0.00083938	0.00354445	-0.00027718	0.168796	0.0113039	0.00260266
7.8237	5.68824	-162.655	-162.582	-162.581	-162.565	-162.54	0.00081678	0.00355554	-0.00027669	0.166666	0.011215	0.00248419
7.8397	5.70358	-162.655	-162.582	-162.581	-162.565	-162.54	0.00079418	0.00356664	-0.00027619	0.164536	0.011126	0.00236573
7.85569	5.71892	-162.655	-162.582	-162.581	-162.565	-162.54	0.00077158	0.00357773	-0.0002757	0.162406	0.011037	0.00224726
7.87169	5.73426	-162.655	-162.582	-162.581	-162.565	-162.54	0.00074898	0.00358883	-0.0002752	0.160275	0.010948	0.0021288
7.88769	5.7496	-162.655	-162.582	-162.581	-162.565	-162.54	0.00072638	0.00359993	-0.00027471	0.158145	0.0108591	0.00201033
7.90369	5.76494	-162.655	-162.582	-162.581	-162.564	-162.54	0.00070378	0.00361102	-0.00027421	0.156015	0.0107701	0.00189186
7.91968	5.78028	-162.655	-162.582	-162.581	-162.564	-162.54	0.00068119	0.00362212	-0.00027371	0.153885	0.0106811	0.0017734
7.93568	5.79562	-162.655	-162.582	-162.581	-162.564	-162.54	0.00065859	0.00363321	-0.00027322	0.151755	0.0105921	0.00165493
7.95168	5.81096	-162.655	-162.582	-162.581	-162.564	-162.54	0.00063599	0.00364431	-0.00027272	0.149625	0.0105031	0.00153646
7.96767	5.8263	-162.655	-162.582	-162.581	-162.564	-162.54	0.00061339	0.0036554	-0.00027223	0.147494	0.0104142	0.001418
7.98367	5.84164	-162.655	-162.582	-162.581	-162.564	-162.54	0.00059079	0.0036665	-0.00027173	0.145364	0.0103252	0.00129953
7.99967	5.85698	-162.655	-162.581	-162.581	-162.564	-162.54	0.00056819	0.00367759	-0.00027124	0.143234	0.0102362	0.00118106
8.01567	5.87232	-162.655	-162.581	-162.581	-162.564	-162.54	0.00055062	0.00368379	-0.0002706	0.141247	0.0101504	0.00107933
8.03166	5.88766	-162.655	-162.581	-162.581	-162.564	-162.54	0.0005373	0.00368584	-0.00026985	0.139381	0.0100674	0.0009917
8.04766	5.903	-162.655	-162.581	-162.581	-162.564	-162.54	0.00052398	0.0036879	-0.00026909	0.137514	0.00998431	0.00090408
8.06366	5.91834	-162.655	-162.581	-162.581	-162.563	-162.54	0.00051066	0.00368996	-0.00026834	0.135648	0.00990124	0.00081645
8.07965	5.93368	-162.655	-162.581	-162.581	-162.563	-162.54	0.00049734	0.00369201	-0.00026758	0.133782	0.00981817	0.00072883
8.09565	5.94902	-162.655	-162.581	-162.581	-162.563	-162.54	0.00048401	0.00369407	-0.00026683	0.131915	0.00973511	0.00064121
8.11165	5.96436	-162.655	-162.581	-162.581	-162.563	-162.54	0.00047069	0.00369613	-0.00026608	0.130049	0.00965204	0.00055358
8.12765	5.9797	-162.655	-162.581	-162.581	-162.563	-162.54	0.00045737	0.00369819	-0.00026532	0.128182	0.00956897	0.00046596
8.14364	5.99504	-162.655	-162.581	-162.581	-162.563	-162.54	0.00044405	0.00370024	-0.00026457	0.126316	0.00948591	0.00037833
8.15964	6.01038	-162.655	-162.581	-162.581	-162.563	-162.54	0.00043072	0.0037023	-0.00026381	0.12445	0.00940284	0.00029071
8.17564	6.02572	-162.655	-162.581	-162.581	-162.563	-162.54	0.00041818	0.00370364	-0.00026305	0.12263	0.00932079	0.00020524
8.19163	6.04106	-162.655	-162.581	-162.581	-162.563	-162.54	0.00040693	0.00370378	-0.00026226	0.120888	0.00924045	0.0001234
8.20763	6.0564	-162.655	-162.581	-162.581	-162.562	-162.54	0.00039861	0.00370119	-0.00026135	0.119409	0.0091655	0.00013953
8.22363	6.07174	-162.655	-162.581	-162.581	-162.562	-162.54	0.00039167	0.0036973	-0.00026038	0.118055	0.0090931	0.00020221
8.23963	6.08708	-162.655	-162.581	-162.581	-162.562	-162.54	0.00038473	0.00369341	-0.00025941	0.116701	0.0090207	0.00026488
8.25562	6.10242	-162.655	-162.581	-162.581	-162.562	-162.54	0.00037779	0.00368952	-0.00025844	0.115347	0.0089483	0.00032755
8.27162	6.11776	-162.655	-162.581	-162.581	-162.562	-162.54	0.00037085	0.00368563	-0.00025748	0.113993	0.0088759	0.00039023
8.28762	6.1331	-162.655	-162.581	-162.581	-162.562	-162.54	0.00036391	0.00368174	-0.00025651	0.112639	0.0088035	0.0004529
8.30361	6.14844	-162.655	-162.581	-162.581	-162.562	-162.54	0.00035697	0.00367785	-0.00025554	0.111285	0.0087311	0.00051558
8.31961	6.16378	-162.655	-162.581	-162.581	-162.562	-162.54	0.00035003	0.00367396	-0.00025457	0.109931	0.00865871	0.00057825
8.33561	6.17912	-162.655	-162.581	-162.581	-162.562	-162.54	0.00034309	0.00367007	-0.0002536	0.108576	0.00858631	0.00064093
8.35161	6.19446	-162.655	-162.581	-162.581	-162.562	-162.54	0.00033615	0.00366618	-0.00025263	0.107222	0.00851391	0.0007036
8.3676	6.2098	-162.655	-162.581	-162.581	-162.561	-162.54	0.00032922	0.00366229	-0.00025166	0.105868	0.00844151	0.00076627
8.3836	6.22514	-162.655	-162.581	-162.581	-162.561	-162.54	0.00032228	0.0036584	-0.00025069	0.104514	0.00836911	0.00082895
8.3996	6.24048	-162.655	-162.581	-162.581	-162.561	-162.54	0.00031534	0.00365451	-0.00024972	0.10316	0.00829671	0.00089162
8.41559	6.25582	-162.655	-162.581	-162.581	-162.561	-162.54	0.0003084	0.00365062	-0.00024875	0.101806	0.00822431	0.0009543
8.43159	6.27116	-162.655	-162.581	-162.581	-162.561	-162.54	0.00030146	0.00364673	-0.00024778	0.100452	0.00815192	0.00101697
8.44759	6.2865	-162.655	-162.581	-162.581	-162.561	-162.54	0.00029452	0.00364284	-0.00024681	0.0990978	0.00807952	0.00107965
8.46358	6.30184	-162.655	-162.581	-162.581	-162.561	-162.54	0.00028758	0.00363895	-0.00024584	0.0977437	0.00800712	0.00114232
8.47958	6.31718	-162.655	-162.581	-162.581	-162.561	-162.54	0.00028064	0.00363506	-0.00024488	0.0963896	0.00793472	0.00120499
8.49558	6.33252	-162.655	-162.581	-162.581	-162.561	-162.54	0.0002737	0.00363117	-0.00024391	0.0950355	0.00786232	0.00126767
8.51158	6.34786	-162.655	-162.581	-162.581	-162.56	-162.54	0.00026677	0.00362728	-0.00024294	0.0936814	0.00778992	0.00133034
8.52757	6.3632	-162.655	-162.581	-162.581	-162.56	-162.54	0.00025983	0.00362339	-0.00024197	0.0923273	0.00771752	0.00139302
8.54357	6.37854	-162.655	-162.581	-162.581	-162.56	-162.54	0.00025289	0.0036195	-0.000241	0.0909732	0.00764513	0.00145569
8.55957	6.39388	-162.655	-162.581	-162.581	-162.56	-162.54	0.00024595	0.00361561	-0.00024003	0.0896191	0.00757273	0.00151837
8.57556	6.40922	-162.655	-162.581	-162.581	-162.56	-162.54	0.00023901	0.00361172	-0.00023906	0.088265	0.00750033	0.00158104
8.59156	6.42456	-162.655	-162.581	-162.581	-162.56	-162.54	0.00023207	0.00360783	-0.00023809	0.086911	0.00742793	0.00164371
8.60756	6.4399	-162.655	-162.581	-162.581	-162.56	-162.54	0.00022513	0.00360394	-0.00023712	0.0855569	0.00735553	0.00170639
8.62356	6.45524	-162.655	-162.581	-162.581	-162.56	-162.54	0.00021819	0.00360005	-0.00023615	0.0842028	0.00728313	0.00176906
8.63955	6.47058	-162.655	-162.581	-162.581	-162.56	-162.54	0.00021125	0.00359616	-0.00023518	0.0828487	0.00721073	0.00183174
8.65555	6.48592	-162.655	-162.581	-162.581	-162.559	-162.54	0.00020431	0.00359227	-0.00023421	0.0814946	0.00713833	0.00189441
8.67155	6.50126	-162.655	-162.581	-162.581	-162.559	-162.54	0.00019738	0.00358838	-0.00023324	0.0801405	0.00706594	0.00195709
8.68754	6.5166	-162.655	-162.581	-162.581	-162.559	-162.54	0.00019044	0.00358449	-0.00023227	0.0787864	0.00699354	0.00201976
8.70354	6.53194	-162.655	-162.581	-162.581	-162.559	-162.54	0.0001835	0.0035806	-0.00023131	0.0774323	0.00692114	0.00208243
8.71954	6.54728	-162.655	-162.581	-162.581	-162.559	-162.54	0.00017656	0.00357671	-0.00023034	0.0760782	0.00684874	0.00214511
8.73554	6.56262	-162.655	-162.581	-162.581	-162.559	-162.54	0.00016962	0.00357282	-0.00022937	0.0747241	0.00677634	0.00220778
8.75153	6.57796	-162.655	-162.581	-162.581	-162.559	-162.54	0.00016268	0.00356893	-0.0002284	0.07337	0.00670394	0.00227046
8.76753	6.5933	-162.655	-162.581	-162.581	-162.559	-162.54	0.00015599	0.00356482	-0.00022742	0.072045	0.00663228	0.00233321
8.78353	6.60864	-162.655	-162.581	-162.581	-162.559	-162.54	0.00015204	0.00355834	-0.00022635	0.0710342	0.00656851	0.00239684
8.79952	6.62398	-162.655	-162.581	-162.581	-162.559	-162.54	0.00014818	0.00355177	-0.00022527	0.0700385	0.00650525	0.00246067
8.81552	6.63932	-162.655	-162.581	-162.581	-162.558	-162.54	0.00014448	0.00354507	-0.00022419	0.0690666	0.00644279	0.00252482
8.83152	6.65466	-162.655	-162.581	-162.581	-162.558	-162.54	0.00014078	0.00353838	-0.00022312	0.0680948	0.00638032	0.00258898
8.84752	6.67	-162.655	-162.581	-162.581	-162.558	-162.54	0.00013708	0.00353168	-0.00022204	0.0671229	0.00631786	0.00265313
8.86351	6.68534	-162.655	-162.581	-162.581	-162.558	-162.54	0.00013363	0.00352479	-0.00022095	0.0661889	0.00625646	0.00271788
8.87951	6.70068	-162.655	-162.581	-162.581	-162.558	-162.54	0.00013024	0.00351786	-0.00021986	0.0652624	0.00619531	0.00278279
8.89551	6.71602	-162.655	-162.581	-162.581	-162.558	-162.54	0.00012694	0.00351085	-0.00021877	0.0643528	0.00613472	0.00284809
8.9115	6.73136	-162.655	-162.581	-162.581	-162.558	-162.54	0.00012374	0.00350378	-0.00021768	0.0634576	0.00607461	0.00291379
8.9275	6.7467	-162.655	-162.581	-162.581	-162.558	-162.54	0.00012061	0.00349666	-0.00021658	0.0625717	0.0060148	0.00297973
8.9435	6.76204	-162.655	-162.581	-162.581	-162.558	-162.54	0.00011759	0.00348944	-0.00021549	0.0617068	0.00595571	0.00304636
8.9595	6.77738	-162.655	-162.581	-162.581	-162.558	-162.54	0.00011463	0.00348219	-0.0002144	0.0608513	0.00589696	0.00311333
8.97549	6.79272	-162.655	-162.581	-162.581	-162.557	-162.54	0.00011183	0.00347483	-0.00021329	0.0600218	0.00583911	0.00318132
8.99149	6.80806	-162.655	-162.581	-162.581	-162.557	-162.54	0.00010903	0.00346747	-0.00021218	0.0591923	0.00578127	0.0032493
9.00749	6.8234	-162.655	-162.581	-162.581	-162.557	-162.54	0.00010623	0.00346012	-0.00021108	0.0583628	0.00572343	0.00331729
9.02348	6.83874	-162.655	-162.581	-162.581	-162.557	-162.54	0.00010359	0.00345265	-0.00020998	0.0575601	0.00566656	0.00338651
9.03948	6.85408	-162.655	-162.581	-162.581	-162.557	-162.54	0.00010099	0.00344515	-0.00020888	0.0567656	0.00560999	0.00345613
9.05548	6.86942	-162.655	-162.581	-162.581	-162.557	-162.54	9.85e-05	0.00343759	-0.00020777	0.0559889	0.0055541	0.00352674
9.07148	6.88476	-162.655	-162.581	-162.581	-162.557	-162.54	9.605e-05	0.00343	-0.00020666	0.0552212	0.00549855	0.00359788
9.08747	6.9001	-162.655	-162.581	-162.581	-162.557	-162.54	9.366e-05	0.00342237	-0.00020555	0.0544647	0.00544342	0.00366971
9.10347	6.91544	-162.655	-162.581	-162.581	-162.557	-162.54	9.135e-05	0.00341469	-0.00020444	0.0537227	0.00538888	0.00374253
9.11947	6.93078	-162.655	-162.581	-162.581	-162.557	-162.54	8.907e-05	0.003407	-0.00020333	0.0529867	0.00533457	0.00381575
9.13546	6.94612	-162.655	-162.581	-162.581	-162.556	-162.54	8.689e-05	0.00339923	-0.00020222	0.0522688	0.00528098	0.00389034
9.15146	6.96146	-162.655	-162.581	-162.581	-162.556	-162.54	8.475e-05	0.00339145	-0.00020112	0.0515575	0.00522766	0.00396548
9.16746	6.9768	-162.655	-162.581	-162.581	-162.556	-162.54	8.267e-05	0.00338364	-0.00020001	0.050858	0.00517483	0.0040416
9.18346	6.99214	-162.655	-162.581	-162.581	-162.556	-162.541	8.067e-05	0.00337578	-0.0001989	0.0501762	0.00512275	0.00411939
9.19945	7.00748	-162.655	-162.581	-162.581	-162.556	-162.541	7.873e-05	0.00336789	-0.00019779	0.0495035	0.00507105	0.00419803
9.21545	7.02282	-162.655	-162.581	-162.581	-162.556	-162.541	7.678e-05	0.00336001	-0.00019669	0.0488308	0.00501936	0.00427667
9.23145	7.03816	-162.655	-162.581	-162.581	-162.556	-162.541	7.487e-05	0.00335211	-0.00019558	0.0481651	0.00496796	0.00435605
9.24744	7.0535	-162.655	-162.581	-162.581	-162.556	-162.541	7.304e-05	0.00334417	-0.00019447	0.0475181	0.00491739	0.00443743
9.26344	7.06884	-162.655	-162.581	-162.581	-162.556	-162.541	7.127e-05	0.0033362	-0.00019336	0.0468806	0.00486724	0.00451995
9.27944	7.08418	-162.655	-162.581	-162.581	-162.556	-162.541	6.953e-05	0.00332821	-0.00019225	0.0462501	0.00481741	0.00460332
9.29543	7.09952	-162.655	-162.581	-162.581	-162.555	-162.541	6.785e-05	0.0033202	-0.00019115	0.0456338	0.00476823	0.00468853
9.31143	7.11486	-162.655	-162.581	-162.581	-162.555	-162.541	6.62e-05	0.00331218	-0.00019005	0.0450223	0.00471926	0.00477441
9.32743	7.1302	-162.655	-162.581	-162.581	-162.555	-162.541	6.461e-05	0.00330413	-0.00018895	0.0444235	0.00467089	0.00486209
9.34343	7.14554	-162.655	-162.581	-162.581	-162.555	-162.541	6.305e-05	0.00329607	-0.00018785	0.0438321	0.00462288	0.00495092
9.35942	7.16088	-162.655	-162.581	-162.581	-162.555	-162.541	6.152e-05	0.00328799	-0.00018675	0.0432484	0.00457524	0.00504095
9.37542	7.17622	-162.655	-162.581	-162.581	-162.555	-162.541	6.005e-05	0.00327991	-0.00018566	0.0426765	0.00452817	0.00513294
9.39142	7.19156	-162.655	-162.581	-162.581	-162.555	-162.541	5.861e-05	0.00327182	-0.00018456	0.0421091	0.00448131	0.0052257
9.40741	7.2069	-162.655	-162.581	-162.581	-162.555	-162.541	5.722e-05	0.00326371	-0.00018347	0.0415545	0.0044351	0.00532081
9.42341	7.22224	-162.655	-162.581	-162.581	-162.555	-162.541	5.585e-05	0.00325559	-0.00018238	0.0410055	0.00438918	0.00541703
9.43941	7.23758	-162.655	-162.581	-162.581	-162.555	-162.541	5.451e-05	0.00324746	-0.00018128	0.0404649	0.00434368	0.00551488
9.45541	7.25292	-162.655	-162.581	-162.581	-162.555	-162.541	5.32e-05	0.00323933	-0.00018024	0.0399303	0.00429733	0.00559001
9.4714	7.26826	-162.655	-162.581	-162.581	-162.554	-162.541	5.192e-05	0.0032312	-0.0001792	0.0393985	0.00425069	0.00565645
9.4874	7.2836	-162.655	-162.581	-162.581	-162.554	-162.541	5.069e-05	0.00322307	-0.00017813	0.0388825	0.00420673	0.00575175
9.5034	7.29894	-162.655	-162.581	-162.581	-162.554	-162.541	4.948e-05	0.00321492	-0.00017705	0.0383713	0.00416301	0.00585093
9.51939	7.31428	-162.655	-162.581	-162.581	-162.554	-162.541	4.832e-05	0.00320675	-0.00017597	0.0378701	0.00411978	0.00595827
9.53539	7.32962	-162.655	-162.581	-162.581	-162.554	-162.541	4.719e-05	0.00319858	-0.00017489	0.0373781	0.00407704	0.00607742
9.55139	7.34496	-162.655	-162.581	-162.581	-162.554	-162.541	4.608e-05	0.0031904	-0.00017379	0.0368916	0.0040346	0.00620361
9.56739	7.3603	-162.655	-162.581	-162.581	-162.554	-162.541	4.501e-05	0.00318224	-0.00017271	0.0364139	0.00399288	0.00631457
9.58338	7.37564	-162.655	-162.581	-162.581	-162.554	-162.541	4.396e-05	0.00317408	-0.00017163	0.0359411	0.00395138	0.00642654
9.59938	7.39098	-162.655	-162.581	-162.581	-162.554	-162.541	4.296e-05	0.00316593	-0.00017057	0.0354819	0.00391037	0.00654531
9.61538	7.40632	-162.655	-162.581	-162.581	-162.554	-162.541	4.196e-05	0.00315777	-0.00016951	0.0350228	0.00386936	0.00666407
9.63137	7.42166	-162.655	-162.581	-162.581	-162.553	-162.541	4.095e-05	0.00314961	-0.00016845	0.0345636	0.00382836	0.00678283
9.64737	7.437	-162.655	-162.581	-162.581	-162.553	-162.541	4e-05	0.00314146	-0.0001674	0.0341187	0.00378817	0.00690628
9.66337	7.45234	-162.655	-162.581	-162.581	-162.553	-162.541	3.906e-05	0.00313331	-0.00016635	0.033678	0.00374822	0.00703119
9.67937	7.46768	-162.655	-162.581	-162.581	-162.553	-162.541	3.817e-05	0.00312517	-0.00016531	0.0332464	0.00370882	0.00715946
9.69536	7.48302	-162.655	-162.581	-162.581	-162.553	-162.541	3.729e-05	0.00311702	-0.00016428	0.0328201	0.00366976	0.00729283
9.71136	7.49836	-162.655	-162.581	-162.581	-162.553	-162.541	3.643e-05	0.00310886	-0.00016325	0.0324	0.0036311	0.00743224
9.72736	7.5137	-162.655	-162.581	-162.581	-162.553	-162.541	3.559e-05	0.00310073	-0.00016221	0.031987	0.00359227	0.00756777
9.74335	7.52904	-162.655	-162.581	-162.581	-162.553	-162.541	3.476e-05	0.00309261	-0.00016117	0.0315769	0.00355353	0.0077029
9.75935	7.54438	-162.655	-162.581	-162.581	-162.553	-162.541	3.398e-05	0.0030845	-0.00016015	0.0311759	0.00351687	0.00784904
9.77535	7.55972	-162.655	-162.581	-162.581	-162.553	-162.541	3.32e-05	0.0030764	-0.00015913	0.0307787	0.0034799	0.00799597
9.79135	7.57506	-162.655	-162.581	-162.581	-162.553	-162.541	3.243e-05	0.0030683	-0.00015812	0.0303876	0.00344242	0.00814423
9.80734	7.5904	-162.655	-162.581	-162.581	-162.552	-162.541	3.169e-05	0.00306022	-0.00015711	0.0300027	0.00340621	0.00829485
9.82334	7.60574	-162.655	-162.581	-162.581	-162.552	-162.541	3.097e-05	0.00305215	-0.0001561	0.0296206	0.00337061	0.00844661
9.83934	7.62108	-162.655	-162.581	-162.581	-162.552	-162.541	3.028e-05	0.00304409	-0.00015512	0.0292479	0.00333499	0.0086039
9.85533	7.63642	-162.655	-162.581	-162.581	-162.552	-162.541	2.959e-05	0.00303603	-0.00015413	0.0288778	0.00329953	0.00876356
9.87133	7.65176	-162.655	-162.581	-162.581	-162.552	-162.541	2.892e-05	0.003028	-0.00015313	0.0285137	0.00326447	0.00892881
9.88733	7.6671	-162.655	-162.581	-162.581	-162.552	-162.541	2.827e-05	0.00301996	-0.00015215	0.0281552	0.00322951	0.00909785
9.90333	7.68244	-162.655	-162.581	-162.581	-162.552	-162.541	2.763e-05	0.00301193	-0.00015119	0.0278005	0.00319463	0.00926949
9.91932	7.69778	-162.655	-162.581	-162.581	-162.552	-162.541	2.702e-05	0.00300395	-0.00015023	0.0274532	0.00316013	0.0094469
9.93532	7.71312	-162.655	-162.581	-162.581	-162.552	-162.541	2.641e-05	0.00299598	-0.00014928	0.0271084	0.00312583	0.0096256
9.95132	7.72846	-162.655	-162.581	-162.581	-162.552	-162.541	2.583e-05	0.00298801	-0.00014833	0.02677	0.00309217	0.0098068
9.96731	7.7438	-162.655	-162.581	-162.581	-162.552	-162.541	2.525e-05	0.00298006	-0.00014739	0.0264356	0.00305884	0.0099917
9.98331	7.75914	-162.655	-162.581	-162.581	-162.552	-162.541	2.469e-05	0.00297211	-0.00014645	0.0261052	0.00302583	0.0101802
9.99931	7.77448	-162.655	-162.581	-162.581	-162.551	-162.541	2.415e-05	0.0029642	-0.00014553	0.0257841	0.00299361	0.0103769
10.0153	7.78982	-162.655	-162.581	-162.581	-162.551	-162.541	2.362e-05	0.00295629	-0.00014461	0.0254651	0.00296157	0.0105756
10.0313	7.80516	-162.655	-162.581	-162.581	-162.551	-162.541	2.309e-05	0.00294838	-0.00014368	0.0251461	0.00292953	0.0107742
10.0473	7.8205	-162.655	-162.581	-162.581	-162.551	-162.541	2.258e-05	0.00294049	-0.00014276	0.0248319	0.00289781	0.0109805
10.0633	7.83584	-162.655	-162.581	-162.581	-162.551	-162.541	2.208e-05	0.00293262	-0.00014185	0.024524	0.00286651	0.0111973
10.0793	7.85118	-162.655	-162.581	-162.581	-162.551	-162.541	2.159e-05	0.00292479	-0.00014094	0.0242215	0.00283573	0.0114136
10.0953	7.86652	-162.655	-162.581	-162.581	-162.551	-162.541	2.111e-05	0.00291697	-0.00014004	0.0239211	0.00280516	0.0116302
10.1113	7.88186	-162.655	-162.581	-162.581	-162.551	-162.541	2.066e-05	0.00290916	-0.00013916	0.0236275	0.00277511	0.0118605
10.1273	7.8972	-162.655	-162.581	-162.581	-162.551	-162.541	2.021e-05	0.00290136	-0.00013827	0.0233361	0.00274521	0.0120954
10.1433	7.91254	-162.655	-162.581	-162.581	-162.551	-162.541	1.977e-05	0.00289359	-0.00013739	0.0230491	0.00271563	0.0123392
10.1593	7.92788	-162.655	-162.581	-162.581	-162.551	-162.541	1.934e-05	0.00288583	-0.00013651	0.0227664	0.00268649	0.0125876
10.1753	7.94322	-162.655	-162.581	-162.581	-162.551	-162.541	1.892e-05	0.00287808	-0.00013564	0.0224861	0.00265759	0.0128384
10.1913	7.95856	-162.655	-162.581	-162.581	-162.55	-162.541	1.851e-05	0.00287039	-0.00013479	0.022212	0.00262922	0.0130942
10.2073	7.9739	-162.655	-162.581	-162.581	-162.55	-162.541	1.811e-05	0.00286269	-0.00013393	0.0219398	0.002601	0.0133558
10.2233	7.98924	-162.655	-162.581	-162.581	-162.55	-162.541	1.772e-05	0.002855	-0.00013308	0.0216721	0.00257317	0.0136337
10.2393	8.00458	-162.655	-162.581	-162.581	-162.55	-162.541	1.734e-05	0.00284734	-0.00013224	0.0214079	0.00254563	0.0139152
10.2553	8.01992	-162.655	-162.581	-162.581	-162.55	-162.541	1.696e-05	0.0028397	-0.0001314	0.0211464	0.00251834	0.0141994
10.2713	8.03526	-162.655	-162.581	-162.581	-162.55	-162.541	1.662e-05	0.0028321	-0.00013057	0.0208929	0.00249211	0.0145048
10.2873	8.0506	-162.655	-162.581	-162.581	-162.55	-162.541	1.628e-05	0.0028245	-0.00012973	0.0206406	0.00246605	0.0148135
10.3033	8.06594	-162.655	-162.581	-162.581	-162.55	-162.541	1.594e-05	0.00281691	-0.0001289	0.0203883	0.00243998	0.0151221
10.3193	8.08128	-162.655	-162.581	-162.581	-162.55	-162.541	1.56e-05	0.00280935	-0.00012808	0.0201399	0.002414	0.0154364
10.3352	8.09662	-162.655	-162.581	-162.581	-162.55	-162.541	1.526e-05	0.00280182	-0.00012729	0.0198959	0.00238811	0.0157568
10.3512	8.11196	-162.655	-162.581	-162.581	-162.55	-162.541	1.495e-05	0.00279433	-0.00012652	0.0196581	0.00236289	0.0160954
10.3672	8.1273	-162.655	-162.581	-162.581	-162.55	-162.541	1.464e-05	0.00278686	-0.00012574	0.0194222	0.00233787	0.0164392
10.3832	8.14264	-162.655	-162.581	-162.581	-162.549	-162.541	1.433e-05	0.00277939	-0.00012497	0.0191863	0.00231286	0.0167829
10.3992	8.15798	-162.655	-162.581	-162.581	-162.549	-162.541	1.402e-05	0.00277194	-0.00012421	0.0189535	0.00228804	0.0171348
10.4152	8.17332	-162.655	-162.581	-162.581	-162.549	-162.541	1.373e-05	0.00276454	-0.00012347	0.0187256	0.00226354	0.0174995
10.4312	8.18866	-162.655	-162.581	-162.581	-162.549	-162.541	1.345e-05	0.00275716	-0.00012274	0.0185012	0.00223935	0.0178757
10.4472	8.204	-162.655	-162.581	-162.581	-162.549	-162.541	1.317e-05	0.0027498	-0.00012201	0.0182784	0.00221531	0.0182568
10.4632	8.21934	-162.655	-162.581	-162.581	-162.549	-162.541	1.29e-05	0.00274249	-0.0001213	0.0180607	0.0021916	0.0186552
10.4792	8.23468	-162.655	-162.581	-162.581	-162.549	-162.541	1.264e-05	0.00273519	-0.0001206	0.0178444	0.00216806	0.0190593
10.4952	8.25002	-162.655	-162.581	-162.581	-162.549	-162.541	1.238e-05	0.00272792	-0.00011991	0.0176314	0.00214491	0.0194762
10.5112	8.26536	-162.655	-162.581	-162.581	-162.549	-162.541	1.213e-05	0.00272067	-0.00011923	0.0174213	0.00212202	0.019905
10.5272	8.2807	-162.655	-162.581	-162.581	-162.549	-162.541	1.189e-05	0.00271343	-0.00011857	0.0172131	0.0020993	0.0203414
10.5432	8.29604	-162.655	-162.581	-162.581	-162.549	-162.541	1.165e-05	0.00270624	-0.00011791	0.017009	0.00207696	0.0207966
10.5592	8.31138	-162.655	-162.581	-162.581	-162.549	-162.541	1.141e-05	0.00269906	-0.00011726	0.0168064	0.00205475	0.0212586
10.5752	8.32672	-162.655	-162.581	-162.581	-162.548	-162.541	1.117e-05	0.00269192	-0.00011663	0.0166072	0.0020329	0.0217378
10.5912	8.34206	-162.655	-162.581	-162.581	-162.548	-162.541	1.095e-05	0.0026848	-0.00011601	0.0164104	0.00201128	0.0222293
10.6072	8.3574	-162.655	-162.581	-162.581	-162.548	-162.541	1.074e-05	0.00267771	-0.0001154	0.0162157	0.00198986	0.022732
10.6232	8.37274	-162.655	-162.581	-162.581	-162.548	-162.541	1.053e-05	0.0026707	-0.00011482	0.016028	0.00196923	0.0232812
10.6392	8.38808	-162.655	-162.581	-162.581	-162.548	-162.541	1.033e-05	0.0026637	-0.00011425	0.0158417	0.00194877	0.02384
10.6552	8.40342	-162.655	-162.581	-162.581	-162.548	-162.541	1.012e-05	0.0026567	-0.00011368	0.0156554	0.0019283	0.0243987
10.6712	8.41876	-162.655	-162.581	-162.581	-162.548	-162.541	9.92e-06	0.00264971	-0.00011311	0.0154691	0.00190784	0.0249575
10.6872	8.4341	-162.655	-162.581	-162.581	-162.548	-162.541	9.71e-06	0.00264271	-0.00011254	0.0152828	0.00188737	0.0255162
10.7032	8.44944	-162.655	-162.581	-162.581	-162.548	-162.541	9.51e-06	0.00263579	-0.000112	0.0151026	0.00186744	0.0261147
10.7192	8.46478	-162.655	-162.581	-162.581	-162.548	-162.541	9.32e-06	0.0026289	-0.00011147	0.0149246	0.00184772	0.0267284
10.7352	8.48012	-162.655	-162.581	-162.581	-162.548	-162.541	9.14e-06	0.00262208	-0.00011098	0.0147503	0.00182865	0.0273735
10.7512	8.49546	-162.655	-162.581	-162.581	-162.548	-162.541	8.97e-06	0.00261527	-0.00011049	0.0145774	0.00180959	0.0280298
10.7672	8.5108	-162.655	-162.581	-162.581	-162.548	-162.541	8.79e-06	0.00260848	-0.00011001	0.0144069	0.00179054	0.0287068
10.7832	8.52614	-162.655	-162.581	-162.581	-162.548	-162.541	8.62e-06	0.00260174	-0.00010956	0.0142389	0.00177172	0.0294074
10.7992	8.54148	-162.655	-162.581	-162.581	-162.547	-162.541	8.46e-06	0.00259502	-0.00010911	0.0140722	0.00175303	0.0301201
10.8152	8.55682	-162.655	-162.581	-162.581	-162.547	-162.541	8.31e-06	0.00258818	-0.0001086	0.0139091	0.00173562	0.0308711
10.8312	8.57216	-162.655	-162.581	-162.581	-162.547	-162.541	8.16e-06	0.0025814	-0.00010811	0.0137471	0.00171813	0.031635
10.8472	8.5875	-162.655	-162.581	-162.581	-162.547	-162.541	8e-06	0.00257478	-0.00010772	0.0135875	0.00170029	0.03243
10.8632	8.60284	-162.655	-162.581	-162.581	-162.547	-162.541	9.58e-06	0.00256821	-0.00010735	0.0137225	0.0016465	0.0332508
10.8791	8.61818	-162.655	-162.581	-162.581	-162.547	-162.541	1.243e-05	0.00256166	-0.00010699	0.0140742	0.00156629	0.0340906
10.8951	8.63352	-162.655	-162.581	-162.581	-162.547	-162.541	1.257e-05	0.00255516	-0.00010667	0.0139717	0.00154259	0.0349726
10.9111	8.64886	-162.655	-162.581	-162.581	-162.547	-162.541	1.234e-05	0.00254868	-0.00010634	0.0138086	0.00152673	0.0358709
10.9271	8.6642	-162.655	-162.581	-162.581	-162.547	-162.541	1.211e-05	0.00254223	-0.00010599	0.0136481	0.00151184	0.0368156
10.9431	8.67954	-162.655	-162.581	-162.581	-162.547	-162.541	1.188e-05	0.00253585	-0.00010571	0.0134904	0.00149657	0.0377968
10.9591	8.69488	-162.655	-162.581	-162.581	-162.547	-162.541	1.167e-05	0.00252955	-0.0001055	0.0133356	0.00148091	0.0388156
10.9751	8.71022	-162.655	-162.581	-162.581	-162.547	-162.541	1.145e-05	0.00252324	-0.0001053	0.0131808	0.00146524	0.0398343
10.9911	8.72556	-162.655	-162.581	-162.581	-162.547	-162.541	1.124e-05	0.00251695	-0.0001051	0.0130266	0.00144962	0.0408659
11.0071	8.7409	-162.655	-162.581	-162.581	-162.546	-162.541	1.104e-05	0.00251081	-0.00010499	0.0128786	0.00143438	0.0420101
11.0231	8.75624	-162.655	-162.581	-162.581	-162.546	-162.541	1.083e-05	0.00250466	-0.00010487	0.0127305	0.00141913	0.0431544
11.0391	8.77158	-162.655	-162.581	-162.581	-162.546	-162.541	1.063e-05	0.00249851	-0.00010476	0.0125825	0.00140389	0.0442986
11.0551	8.78692	-162.655	-162.581	-162.581	-162.546	-162.541	1.044e-05	0.00249245	-0.00010471	0.012438	0.00138888	0.0455193
11.0711	8.80226	-162.655	-162.581	-162.581	-162.546	-162.541	1.025e-05	0.00248642	-0.00010468	0.012295	0.00137396	0.0467722
11.0871	8.8176	-162.655	-162.581	-162.581	-162.546	-162.541	1.006e-05	0.00248048	-0.00010471	0.0121551	0.00135925	0.0481038
11.1031	8.83294	-162.655	-162.581	-162.581	-162.546	-162.541	9.89e-06	0.00247459	-0.00010481	0.0120167	0.00134408	0.0494514
11.1191	8.84828	-162.655	-162.581	-162.581	-162.546	-162.541	9.72e-06	0.00246879	-0.00010505	0.0118814	0.00132798	0.0508325
11.1351	8.86362	-162.655	-162.581	-162.581	-162.546	-162.541	9.55e-06	0.00246301	-0.00010523	0.011747	0.00131316	0.0522992
11.1511	8.87896	-162.655	-162.581	-162.581	-162.546	-162.541	9.37e-06	0.00245723	-0.00010537	0.0116132	0.0012991	0.0538167
11.1671	8.8943	-162.655	-162.581	-162.581	-162.546	-162.541	9.21e-06	0.00245154	-0.00010558	0.0114822	0.00128529	0.0554329
11.1831	8.90964	-162.655	-162.581	-162.581	-162.546	-162.541	9.04e-06	0.00244589	-0.00010581	0.011352	0.00127154	0.0570838
11.1991	8.92498	-162.655	-162.581	-162.581	-162.546	-162.541	8.88e-06	0.00244031	-0.0001061	0.0112242	0.00125798	0.0588231
11.2151	8.94032	-162.655	-162.581	-162.581	-162.546	-162.541	8.73e-06	0.00243486	-0.00010649	0.0110993	0.00124464	0.0607096
11.2311	8.95566	-162.655	-162.581	-162.581	-162.545	-162.541	8.58e-06	0.00242952	-0.00010696	0.0109771	0.00123147	0.0627203
11.2471	8.971	-162.655	-162.581	-162.581	-162.545	-162.541	8.43e-06	0.00242418	-0.00010742	0.0108549	0.00121829	0.0647311
11.2631	8.98634	-162.655	-162.581	-162.581	-162.545	-162.541	8.29e-06	0.00241883	-0.00010789	0.0107327	0.00120512	0.0667418
11.2791	9.00168	-162.655	-162.581	-162.581	-162.545	-162.541	8.14e-06	0.00241349	-0.00010836	0.0106105	0.00119195	0.0687525
11.2951	9.01702	-162.655	-162.581	-162.581	-162.545	-162.541	8e-06	0.00240827	-0.00010891	0.0104914	0.00117945	0.0709652
11.3111	9.03236	-162.655	-162.581	-162.581	-162.545	-162.541	7.86e-06	0.0024032	-0.00010956	0.0103758	0.00116773	0.0734171
11.3271	9.0477	-162.655	-162.581	-162.581	-162.545	-162.541	7.73e-06	0.00239813	-0.00011021	0.0102602	0.00115601	0.075869
11.3431	9.06304	-162.655	-162.581	-162.581	-162.545	-162.541	7.59e-06	0.00239309	-0.00011088	0.0101449	0.00114423	0.0783394
11.3591	9.07838	-162.655	-162.581	-162.581	-162.545	-162.541	7.46e-06	0.00238832	-0.00011183	0.0100339	0.0011316	0.081063
11.3751	9.09372	-162.655	-162.581	-162.581	-162.545	-162.541	7.33e-06	0.00238362	-0.00011282	0.00992377	0.00111908	0.0838699
11.3911	9.10906	-162.655	-162.581	-162.581	-162.545	-162.541	7.21e-06	0.00237905	-0.00011388	0.00981531	0.00110673	0.0868165
11.4071	9.1244	-162.655	-162.581	-162.581	-162.545	-162.541	7.09e-06	0.00237468	-0.00011521	0.00970893	0.00109293	0.0899251
11.4231	9.13974	-162.655	-162.581	-162.581	-162.545	-162.541	6.98e-06	0.00237041	-0.00011668	0.00960355	0.00107846	0.0931104
11.439	9.15508	-162.655	-162.581	-162.581	-162.545	-162.541	6.87e-06	0.00236577	-0.00011766	0.00949968	0.00107045	0.0967452
11.455	9.17042	-162.655	-162.581	-162.581	-162.544	-162.541	6.76e-06	0.00236149	-0.00011898	0.00939795	0.00106095	0.100612
11.471	9.18576	-162.655	-162.581	-162.581	-162.544	-162.541	6.65e-06	0.00235813	-0.00012117	0.00930143	0.00104747	0.105035
11.487	9.2011	-162.655	-162.581	-162.581	-162.544	-162.541	6.54e-06	0.00235478	-0.00012336	0.0092049	0.00103399	0.109457
11.503	9.21644	-162.655	-162.581	-162.581	-162.544	-162.541	6.44e-06	0.00235142	-0.00012555	0.00910838	0.00102051	0.113879
11.519	9.23178	-162.655	-162.581	-162.581	-162.544	-162.541	6.33e-06	0.00234806	-0.00012774	0.00901186	0.00100703	0.118302
11.535	9.24712	-162.655	-162.581	-162.581	-162.544	-162.541	6.22e-06	0.0023447	-0.00012993	0.00891534	0.00099355	0.122724
11.551	9.26246	-162.655	-162.581	-162.581	-162.544	-162.541	6.11e-06	0.00234134	-0.00013212	0.00881881	0.00098008	0.127146
11.567	9.2778	-162.655	-162.581	-162.581	-162.544	-162.541	6.01e-06	0.00233834	-0.00013465	0.00872566	0.0009671	0.132181
11.583	9.29314	-162.655	-162.581	-162.581	-162.544	-162.541	5.92e-06	0.00233569	-0.0001375	0.00863576	0.0009546	0.137809
11.599	9.30848	-162.655	-162.581	-162.581	-162.544	-162.541	5.83e-06	0.00233607	-0.00014327	0.00855871	0.0009373	0.147045
11.615	9.32382	-162.655	-162.581	-162.581	-162.544	-162.541	5.75e-06	0.00233714	-0.0001497	0.0084846	0.0009189	0.157109
11.631	9.33916	-162.655	-162.581	-162.581	-162.544	-162.541	5.67e-06	0.00233821	-0.00015614	0.0084105	0.0009005	0.167173
11.647	9.3545	-162.655	-162.581	-162.581	-162.544	-162.541	5.58e-06	0.00233928	-0.00016257	0.00833639	0.0008821	0.177237
11.663	9.36984	-162.655	-162.581	-162.581	-162.544	-162.541	5.5e-06	0.00234035	-0.00016901	0.00826229	0.0008637	0.187301
11.679	9.38518	-162.655	-162.581	-162.581	-162.544	-162.541	5.42e-06	0.00234142	-0.00017544	0.00818818	0.0008453	0.197364
11.695	9.40052	-162.655	-162.581	-162.581	-162.543	-162.541	5.33e-06	0.00234249	-0.00018188	0.00811407	0.0008269	0.207428
11.711	9.41586	-162.655	-162.581	-162.581	-162.543	-162.541	5.25e-06	0.00234356	-0.00018831	0.00803997	0.0008085	0.217492
11.727	9.4312	-162.655	-162.581	-162.581	-162.543	-162.541	5.17e-06	0.00234463	-0.00019475	0.00796586	0.00079009	0.227556
11.743	9.44654	-162.655	-162.581	-162.581	-162.543	-162.541	5.08e-06	0.0023457	-0.00020118	0.00789175	0.00077169	0.23762
11.759	9.46188	-162.655	-162.581	-162.581	-162.543	-162.541	5e-06	0.00234677	-0.00020762	0.00781765	0.00075329	0.247684
11.775	9.47722	-162.655	-162.581	-162.581	-162.543	-162.541	4.92e-06	0.00234784	-0.00021406	0.00774354	0.00073489	0.257748
11.791	9.49256	-162.655	-162.581	-162.581	-162.543	-162.541	4.83e-06	0.00234891	-0.00022049	0.00766944	0.00071649	0.267811
11.807	9.5079	-162.655	-162.581	-162.581	-162.543	-162.541	4.75e-06	0.00235358	-0.00023048	0.00760518	0.00069149	0.281667
11.823	9.52324	-162.655	-162.581	-162.581	-162.543	-162.541	4.68e-06	0.0023688	-0.00025089	0.00756982	0.00064711	0.306647
11.839	9.53858	-162.655	-162.581	-162.581	-162.543	-162.541	4.61e-06	0.00238401	-0.00027131	0.00753445	0.00060273	0.331626
11.855	9.55392	-162.655	-162.581	-162.581	-162.543	-162.541	4.54e-06	0.00239923	-0.00029172	0.00749909	0.00055835	0.356606
11.871	9.56926	-162.655	-162.581	-162.581	-162.543	-162.541	4.48e-06	0.00241445	-0.00031214	0.00746373	0.00051397	0.381585
11.887	9.5846	-162.655	-162.581	-162.581	-162.543	-162.541	4.41e-06	0.00242967	-0.00033255	0.00742836	0.00046959	0.406564
11.903	9.59994	-162.655	-162.581	-162.581	-162.543	-162.541	4.34e-06	0.00244488	-0.00035296	0.007393	0.00042521	0.431544
11.919	9.61528	-162.655	-162.581	-162.581	-162.543	-162.541	4.27e-06	0.00246927	-0.00038252	0.00737846	0.00036245	0.46495
11.935	9.63062	-162.655	-162.581	-162.581	-162.542	-162.541	4.2e-06	0.0025038	-0.00042219	0.00738698	0.00027936	0.507686
11.951	9.64596	-162.655	-162.581	-162.581	-162.542	-162.541	4.14e-06	0.00264882	-0.00057231	0.0076313	0.00049835	0.632982
11.967	9.6613	-162.655	-162.581	-162.581	-162.542	-162.541	4.08e-06	0.00282507	-0.00075365	0.00794226	0.0008027	0.781611
11.9829	9.67664	-162.655	-162.581	-162.581	-162.542	-162.541	4.02e-06	0.00300131	-0.00093499	0.00825322	0.00110706	0.930239
11.9989	9.69198	-162.655	-162.581	-162.581	-162.542	-162.541	3.96e-06	0.00317756	-0.00111633	0.00856418	0.00141142	1.07887
12.0149	9.70732	-162.655	-162.581	-162.581	-162.542	-162.541	3.91e-06	0.0033538	-0.00129767	0.00887514	0.00171578	1.2275
12.0309	9.72266	-162.655	-162.581	-162.581	-162.542	-162.541	3.85e-06	0.00353005	-0.00147901	0.0091861	0.00202013	1.37613
12.0469	9.738	-162.655	-162.581	-162.581	-162.542	-162.541	3.79e-06	0.00370629	-0.00166035	0.00949706	0.00232449	1.52475
